# Supplementary material for: Synthesis, transacylation kinetics and computational chemistry of a set of arylacetic acid 1β-O-acyl glucuronides
Source: Royal Society of Chemistry journal article supplement (doi:10.1039/b822777b), 2009-01-01
Supplement: b822777b.pdf [file b822777b.pdf]

## A synthetic, NMR and computational study of a set of arylacetic acid 1 $\beta$ -O-acyl glucuronides: a first computational and mechanistic explanation of observed acyl migration rates

Neil G. Berry,<sup>a</sup> Lisa Iddon,<sup>a</sup> Mazhar Iqbal,<sup>a</sup> Xiaoli Meng,<sup>a</sup> Prabha Jayapal,<sup>a</sup> Caroline H. Johnson,<sup>b</sup> Jeremy K. Nicholson,<sup>b</sup> John C. Lindon,<sup>b</sup> John R. Harding,<sup>c</sup> Ian D. Wilson<sup>c</sup> and Andrew V. Stachulski<sup>a\*</sup>

<sup>a</sup> Robert Robinson Laboratories, Department of Chemistry, University of Liverpool, Liverpool L69 7ZD UK.

E-mail: stachuls@liv.ac.uk; Fax: 44(0)151 794 3588; Tel: 44(0)151 794 3542

<sup>b</sup> Department of Biomolecular Medicine, Division of Surgery, Oncology, Reproductive Biology and Anaesthetics (SORA), Faculty of Medicine, Sir Alexander Fleming Building, Imperial College London, South Kensington, London, SW7 2AZ UK

<sup>c</sup> DMPK, Astra Zeneca Pharmaceuticals, Mereside, Alderley Park, Macclesfield, Cheshire SK10 4TG UK

**Contents:** Synthesis of compound **7**; photocopy NMR spectra for compounds **10**, **11** and **14**; pulse sequences and parameters used in the NMR rate measurements. Tabulated data for some of the parameters used in the DFT study are appended as well as further computational data, including figures and detailed coordinates of transition states.

### Chemical synthesis

**$\alpha,\alpha$ -(Dimethyl)phenylacetic Acid, 7.** This compound was prepared according to literature procedures<sup>38, 39</sup> by methylation of 2-phenylpropanal followed by sodium chlorite oxidation. The product was obtained as a white solid. Found: m/z, 182.119. C<sub>10</sub>H<sub>16</sub>NO<sub>2</sub> [MNH<sub>4</sub><sup>+</sup>] requires m/z, 182.118;  $\delta_{\text{H}}$  (CDCl<sub>3</sub>) 1.52 [6 H, s, (CH<sub>3</sub>)<sub>2</sub>C], 7.18 (1 H, m, ArH), 7.25 (2 H, m, ArH) and 7.32 (2 H, m, ArH);  $\delta_{\text{C}}$  (CDCl<sub>3</sub>) 26.2, 45.3, 124.8, 125.9, 127.4, 142.9 and 181.9; m/z (CI, NH<sub>3</sub>) 182 (MNH<sub>4</sub><sup>+</sup>, 100%).

# <sup>1</sup>H NMR Spectra of compounds 10, 11 and 14

## Compound 10

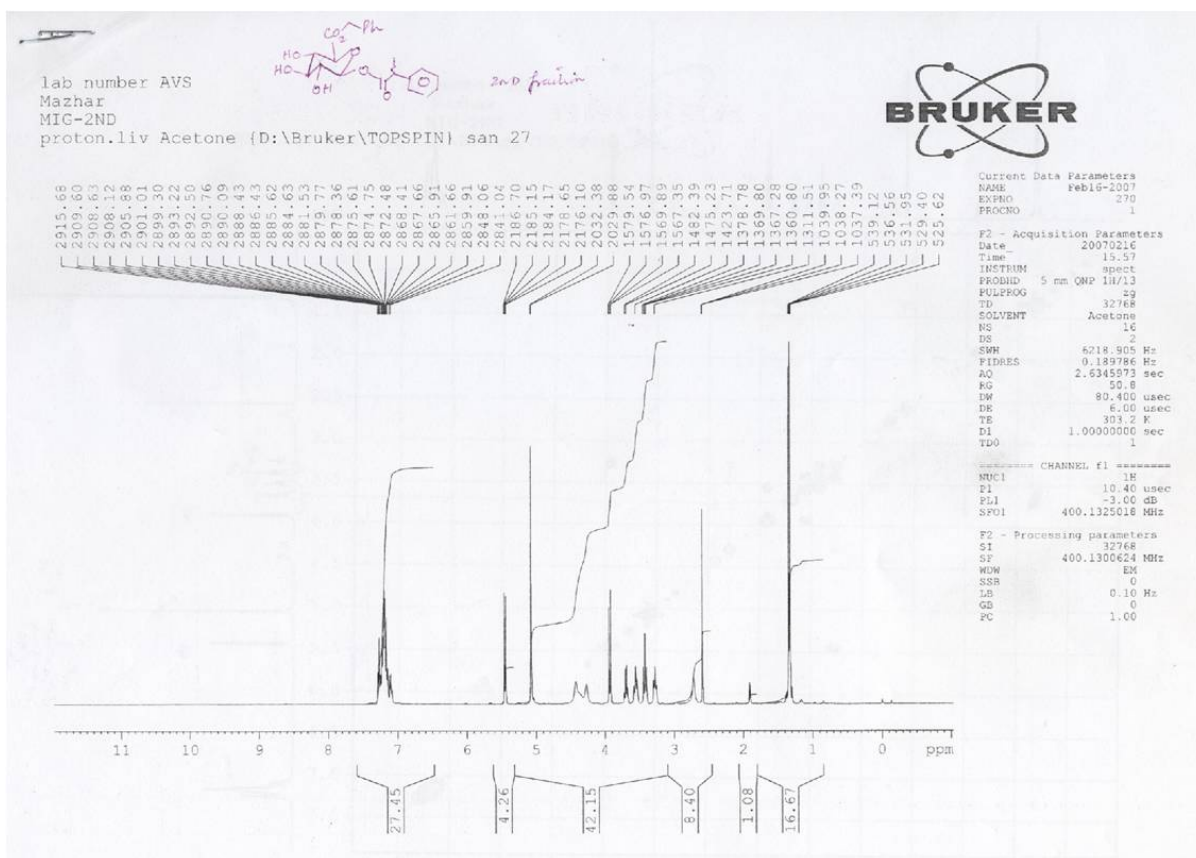

## Compound 11

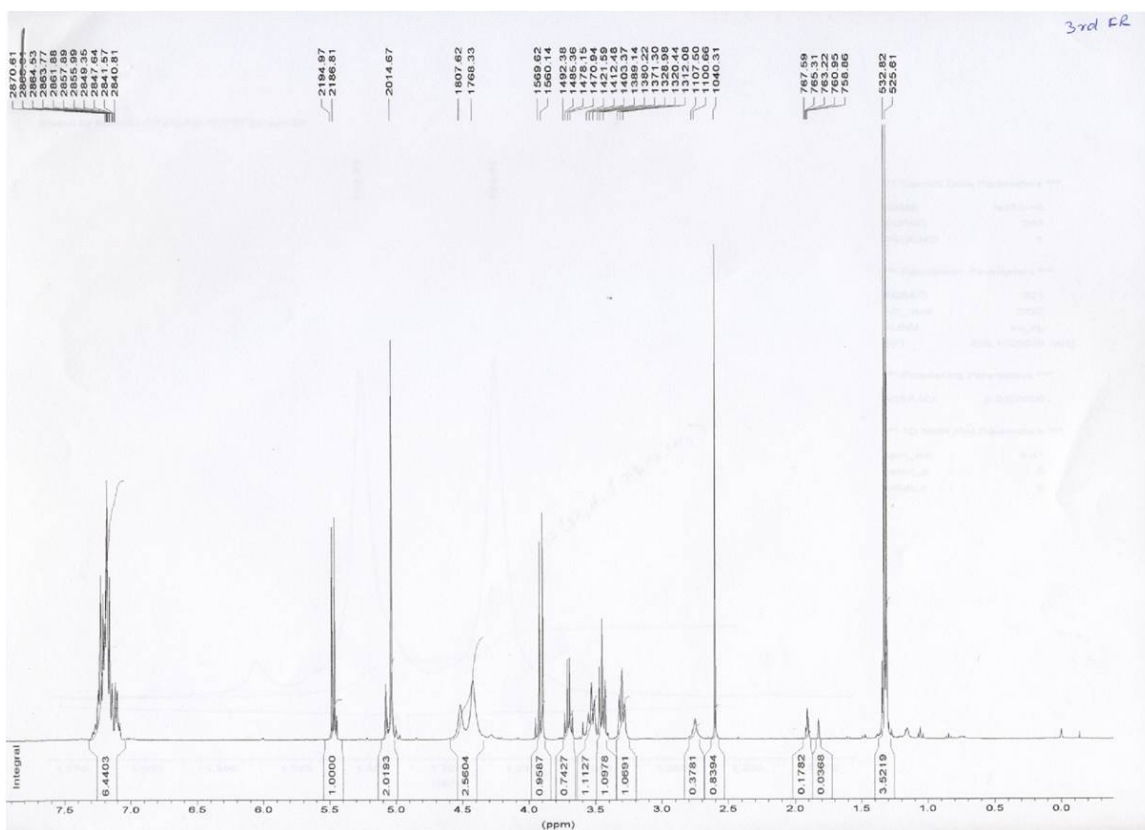

## Compound 14

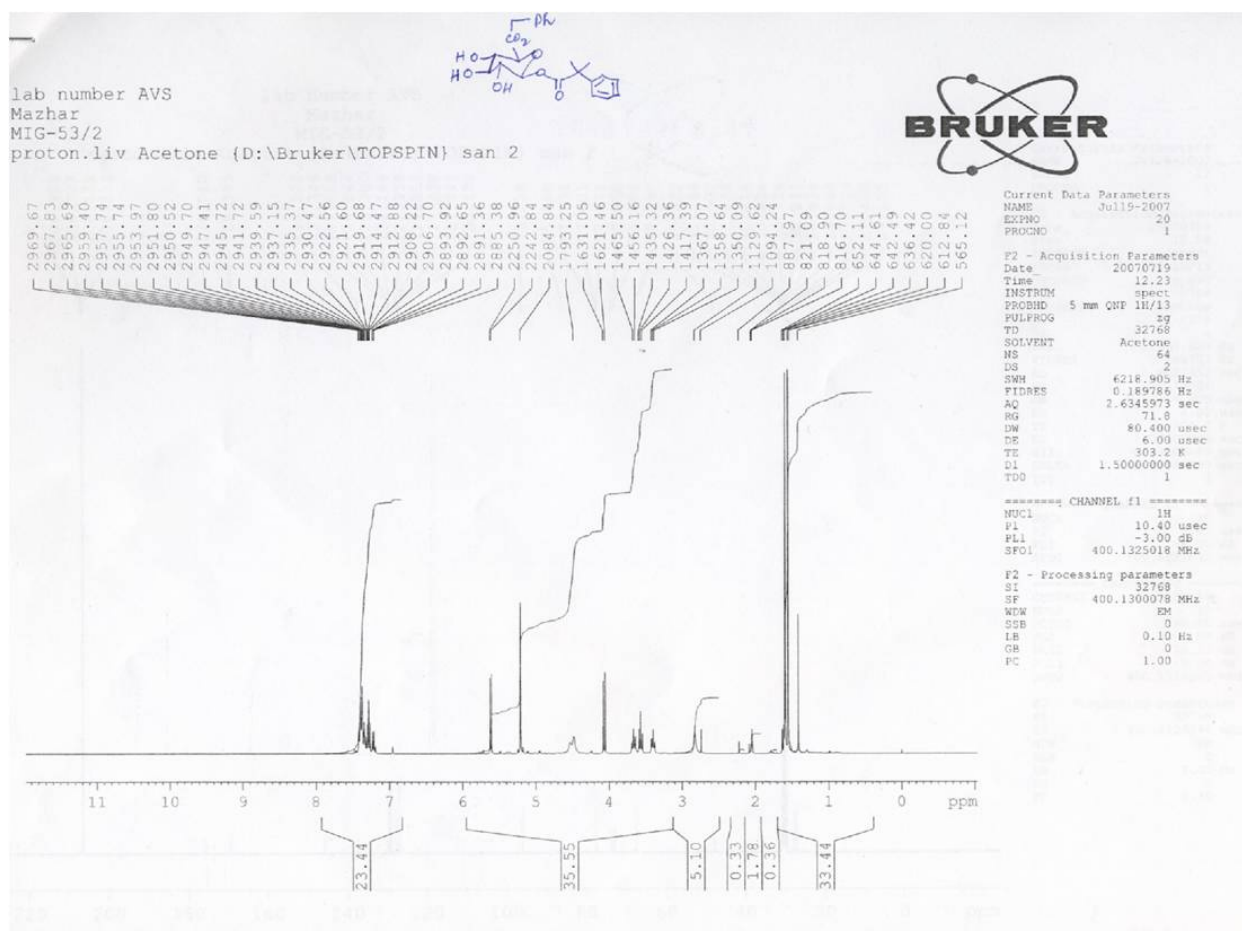

## NMR Measurements: Pulse sequences and parameters used

### Degradation rate measurements

Once the acquisition parameters were optimized using a standard sample, 550  $\mu\text{L}$  of 100mM sodium phosphate buffer (pH 7.4) was added quickly to one of the samples (e.g. 1.5 mg of synthesized sample). The sample was transferred to a 5 mm NMR tube containing 50  $\mu\text{L}$  TSP (0.5 mg/mL in  $^2\text{H}_2\text{O}$ ) and 16 scans were acquired with a spectral width of 20.017 ppm. The spectrum was phased manually, and an automated program was run by which 158 spectra were acquired sequentially. The first 61 experiments were acquired with a time delay of 59.2 s between experiments; the subsequent 95 experiments were acquired with a time delay of 636.4 s between each experiment. The total reaction times for the two segments are 1.48 and 17.58 h respectively. An exponential apodization function corresponding to a line-broadening factor of 0.3 Hz was applied to the FIDs. Spectra were chosen at different time points, and manually phase- and baseline-

corrected. The  $\beta$ -anomeric proton doublet (at  $\delta \sim 5.6$  ppm) of the AGs was chosen to monitor the degradation. Integration was used to measure the intensity of the doublet which was referenced to the TSP peak set at unity. The logarithms of the intensities were plotted against time, and the slope of the graph gave the degradation rate constant assuming first-order kinetics.

**$^{13}\text{C}$  NMR spectroscopy to determine the carbonyl carbon chemical shift:**  $^1\text{H}$ -decoupled  $^{13}\text{C}$  NMR spectra were measured on the AGs. The samples were dissolved in 600  $\mu\text{l}$  DMSO- $d_6$ , and 550  $\mu\text{l}$  were added to a 5 mm NMR tube containing 50  $\mu\text{l}$  TSP (0.5 mg/ml in  $^2\text{H}_2\text{O}$ ). Each sample was analysed using a Bruker AVANCE DRX800 NMR spectrometer, with a 5 mm z-gradient triple-resonance inverse (TXI) cryoprobe. A standard  $^1\text{H}$ -decoupled  $^{13}\text{C}$  pulse sequence was used with a waltz-16  $^1\text{H}$ -decoupling sequence. The  $^{13}\text{C}$  transmitter pulse angle was set to  $30^\circ$  and 5 k FIDs were collected into 64 k data points with a spectral width of 354.9 ppm and a relaxation delay of 2 s. A  $^1\text{H}$ - $^{13}\text{C}$  HMBC spectrum using the standard pulse sequence (Bruker Biospin) was also measured to confirm the assignment of the carbonyl  $^{13}\text{C}$  chemical shift. 220 ( $F_1$ ) x 2 k ( $F_2$ ) data points were acquired which were zero-filled into a 2 k ( $F_1$ ) x 16 k ( $F_2$ ) matrix. The spectral width in the  $^1\text{H}$  domain was 11.0 ppm, and in the  $^{13}\text{C}$  domain was 250.0 ppm.

## Computational Chemistry

### Calculation of transition state energies

Comparing the bond lengths among the transition states for **9**, we infer that there is a decrease in the bond length (distance a of TS2) when the C=O and the phenyl ring have a dihedral angle above  $170^\circ$  (Figure S1). This may be due to the reduced steric interaction between the phenyl ring and the oxygen of the 2-hydroxyl group, when compared with the other conformers whose corresponding dihedral angles are below  $100^\circ$  (Table S1). Even though TS 4 of **9** has a dihedral angle of  $174.41^\circ$ , it has a somewhat longer distance a (2.11 Å) when compared to TS1 (1.91 Å) (Figure S1). This is presumably due to the influence of the phenyl hydrogen on the alkoxide oxygen. This increase in distance for TS4 was reflected in the markedly higher activation energy for TS4 (9.74 kcal/mol cf. TS1 6.85 kcal/mol). This is similar to the carbon-fluorine (on

the phenyl ring) interaction observed by Nicholls *et al*<sup>1</sup>, which influences the acyl group migration. While comparing the transition states whose dihedral angles are below 80, (i.e. TS1, TS3 and TS5 of **9**) it is noted that as the distance *a* increases, the activation energy decreases (6.85, 6.34, 5.44 kcal/mol respectively).

From examination of Table S1, similarly to **9**, the distance *a*, becomes shorter and the bond *b* become longer from the ground state to the transition state. For TS4 of **12** distance *a* is longer (2.17 Å) compared with the other transition states (Figure S2). Even though the carbonyl group and the phenyl ring are away from each other [O=C-C-C (Ph) 173.0°, hence reduced hindrance], there is an unfavourable interaction between the phenyl proton and the oxygen, leading to the longer bond distance (similar to TS4 of **9**). This may lead to the higher calculated activation energy (12.93 kcal/mol) when compared to the other four transition states (TS1 10.00 kcal/mol, TS2 9.30 kcal/mol, TS3 10.10 kcal/mol and TS5 6.16 kcal/mol).

A similar trend was observed in the bond formation and cleavage as described above for **9** and **12**. Examination of the transition states TS1 and TS3 of **13** revealed that the C=O and phenyl group are disposed near anti-periplanar and hence have reduced hindrance with the hydroxyl oxygen (2.07 Å and 1.91 Å for TS1 and TS3 respectively, Figure S2). However, TS1 has distance *a* of 0.16 Å longer than TS3. This could be explained by the influence of the substituted methyl group, which is close to the alkoxide oxygen whereas in TS3 it is opposite to the oxygen. The interaction of the methyl group was also influenced by the formation of a longer bond (2.30 Å) in TS2 of **13**.

While comparing the distance *a* among the transition states, TS2 has the longest (2.27 Å) and TS4 has the smallest (1.89 Å) bond distance. In TS2 the hydroxyl oxygen was influenced by one of the methyl groups and the phenyl ring whereas in TS4 it is not. TS1 follows the lowest energy favourable energy pathway (Figure S3).

## Figure S1

<sup>1</sup> Nicholls, A. W.; Akira, K.; Lindon, J. C.; Farrant, R. D.; Wilson, I. D.; Harding, J.; Killick, D. A.; Nicholson, J. K. NMR Spectroscopy and Theoretical Chemistry Studies on the Internal Acyl Migration Reactions of the 1-*O*-Acyl-β-D-glucopyranuronate Conjugates of 2-, 3-, and 4-(Trifluoromethyl)benzoic Acids. *Chem. Res. Toxicol.* **1996**, *9*, 1414-1424.

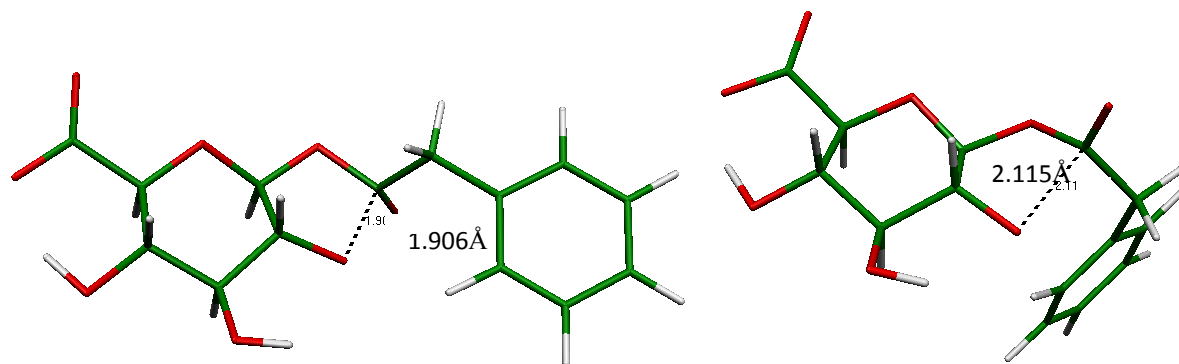

Figure S2

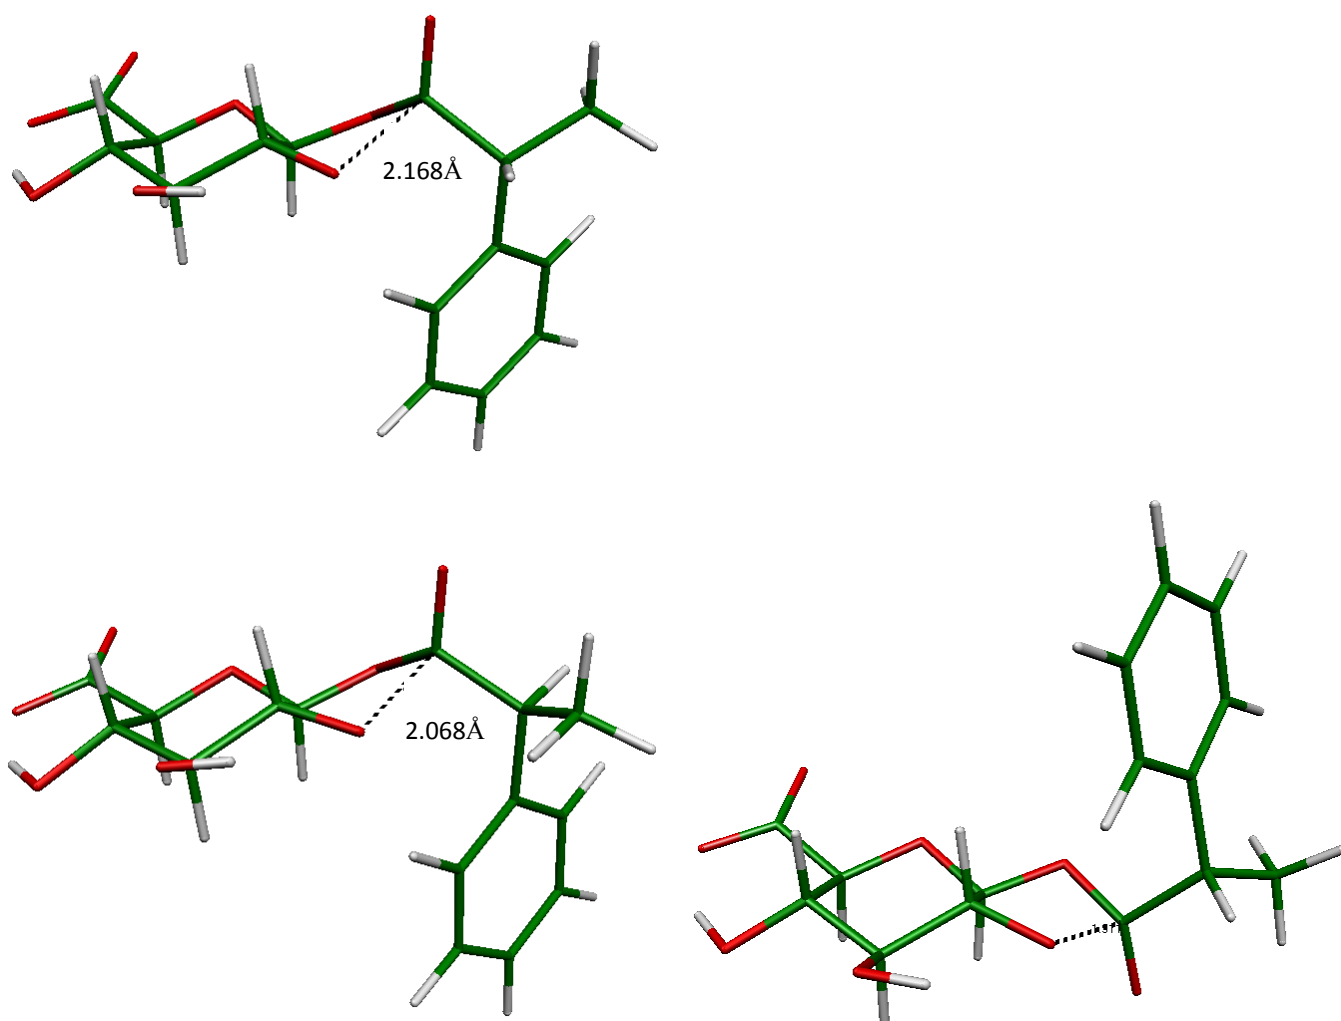

Figure S3

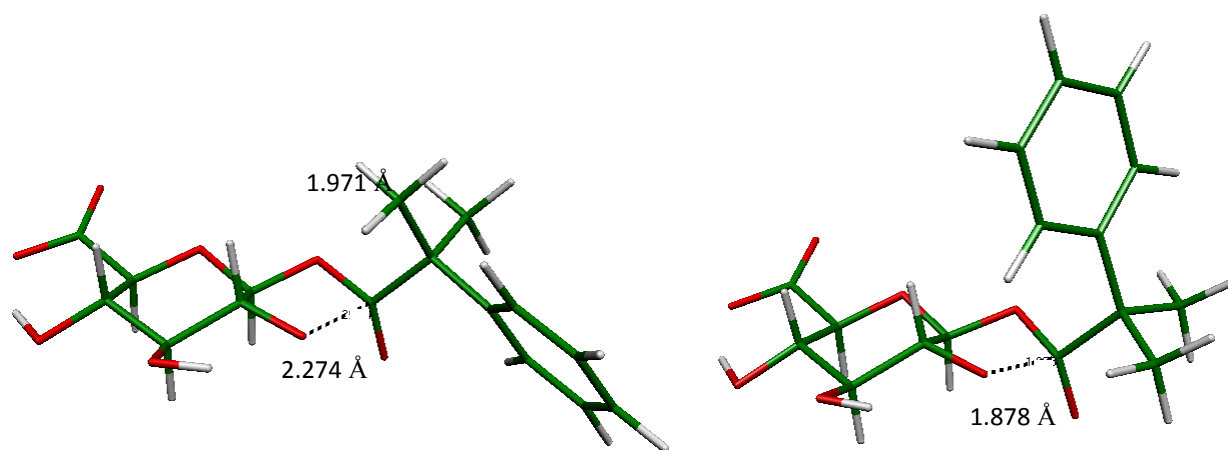

**Table S1** The calculated intramolecular bond length using B3LYP/6-31G\*\* level of theory. Distances: **a** (nucleophilic alkoxide – carbonyl carbon) and **b** (carbonyl oxygen – carbonyl carbon).

| Bond length/Angle | Reactant |        |        |        |        |        |       | TS     |        |        |        |        |
|-------------------|----------|--------|--------|--------|--------|--------|-------|--------|--------|--------|--------|--------|
|                   | GS1      | GS2    | GS3    | GS4    | GS5    | GS6    | GS7   | TS1    | TS2    | TS3    | TS4    | TS5    |
| <b>12 (R)</b>     |          |        |        |        |        |        |       |        |        |        |        |        |
| Distance <b>a</b> | 4.78     | 4.75   | 4.57   | 4.31   | 4.31   | 4.78   | 3.69  | 1.91   | 1.82   | 2.26   | 2.11   | 2.27   |
| Distance <b>b</b> | 1.33     | 1.33   | 1.32   | 1.32   | 1.32   | 1.33   | 1.34  | 1.46   | 1.46   | 1.40   | 1.42   | 1.38   |
| Angle O=C-C-C(Ph) | 23.66    | 126.70 | 100.23 | 23.96  | 23.96  | 124.58 | 62.83 | 41.95  | 179.16 | 86.22  | 174.41 | 64.64  |
| <b>13 (S)</b>     |          |        |        |        |        |        |       |        |        |        |        |        |
| Distance <b>a</b> | 4.80     | 4.51   | 4.78   | 4.76   | 4.55   | 4.16   |       | 1.93   | 2.03   | 1.96   | 2.17   | 2.12   |
| Distance <b>b</b> | 1.33     | 1.31   | 1.32   | 1.32   | 1.32   | 1.34   |       | 1.46   | 1.43   | 1.45   | 1.41   | 1.40   |
| Angle O=C-C-C(Ph) | 106.07   | 90.12  | 119.73 | 62.85  | 85.51  | 58.83  |       | 44.26  | 65.02  | 42.64  | 173.00 | 71.92  |
| <b>15</b>         |          |        |        |        |        |        |       |        |        |        |        |        |
| Distance <b>a</b> | 4.81     | 4.17   | 4.23   | 4.54   |        |        |       | 2.07   | 2.30   | 1.91   | 1.91   | 2.11   |
| Distance <b>b</b> | 1.33     | 1.34   | 1.33   | 1.32   |        |        |       | 1.42   | 1.38   | 1.43   | 1.46   | 1.42   |
| Angle O=C-C-C(Ph) | 36.62    | 57.96  | 45.48  | 105.45 |        |        |       | 176.78 | 73.90  | 177.42 | 50.92  | 64.64  |
| Distance <b>a</b> | 4.26     | 4.26   | 4.58   | 4.56   | 4.56   |        |       | 1.92   | 2.27   | 2.07   | 1.89   | 2.11   |
| Distance <b>b</b> | 1.34     | 1.34   | 1.32   | 1.31   | 1.31   |        |       | 1.45   | 1.39   | 1.43   | 1.44   | 1.42   |
| Angle O=C-C-C(Ph) | 172.77   | 172.78 | 95.75  | 101.36 | 101.29 |        |       | 66.33  | 35.92  | 44.52  | 179.28 | 178.34 |





|                   |        |        |
|-------------------|--------|--------|
| HOMO              | -0.202 | -0.202 |
| LUMO              | -0.018 | -0.018 |
| Hardness          | 0.092  | 0.092  |
| Softness          | 5.435  | 5.435  |
| Electronegativity | -0.110 | -0.110 |
| Electrophilicity  | 0.046  | 0.046  |

---

15

---

|                   |        |        |        |        |        |        |
|-------------------|--------|--------|--------|--------|--------|--------|
| Acyl oxygen       | -0.57  | -0.57  | -0.57  | -0.57  | -0.57  | -0.570 |
| Attacking oxygen  | -0.99  | -0.99  | -0.98  | -0.98  | -0.98  | -0.980 |
| Carbonyl carbon   | 0.86   | 0.86   | 0.84   | 0.84   | 0.84   | 0.840  |
| Carbonyl oxygen   | -0.65  | -0.65  | -0.68  | -0.68  | -0.68  | -0.680 |
| HOMO              | -0.203 | -0.203 | -0.202 | -0.202 | -0.202 | -0.202 |
| LUMO              | -0.024 | -0.024 | -0.022 | -0.021 | -0.021 | -0.021 |
| Hardness          | 0.090  | 0.090  | 0.090  | 0.091  | 0.091  | 0.090  |
| Softness          | 5.587  | 5.587  | 5.556  | 5.525  | 5.525  | 5.527  |
| Electronegativity | -0.114 | -0.114 | -0.112 | -0.112 | -0.112 | -0.112 |
| Electrophilicity  | 0.045  | 0.045  | 0.045  | 0.045  | 0.045  | 0.045  |

---

**Table S3.** The frontier orbital energies, global hardness, softness, electronegativity and electrophilicity involved in the transition state using B3LYP/6-31G\*\*.

| Properties        | <b>9</b> |        |        |        |        |                    |
|-------------------|----------|--------|--------|--------|--------|--------------------|
|                   | TS1      | TS2    | TS3    | TS4    | TS5    | Boltzmann Weighted |
| HOMO (Hartree)    | -0.225   | -0.225 | -0.212 | -0.216 | -0.212 | -0.213             |
| Hardness          | 0.106    | 0.105  | 0.095  | 0.100  | 0.094  | 0.095              |
| Softness          | 4.739    | 4.746  | 5.291  | 5.000  | 5.348  | 5.294              |
| Electronegativity | -0.120   | -0.120 | -0.118 | -0.116 | -0.119 | -0.118             |
| Electrophilicity  | 0.053    | 0.053  | 0.047  | 0.050  | 0.047  | 0.047              |
| <b>12</b>         |          |        |        |        |        |                    |
| HOMO (Hartree)    | -0.222   | -0.218 | -0.225 | -0.213 | -0.223 | -0.223             |
| Hardness          | 0.105    | 0.101  | 0.107  | 0.099  | 0.102  | 0.102              |
| Softness          | 4.785    | 4.950  | 4.695  | 5.051  | 4.902  | 4.902              |
| Electronegativity | -0.118   | -0.117 | -0.119 | -0.114 | -0.121 | -0.121             |
| Electrophilicity  | 0.052    | 0.051  | 0.053  | 0.050  | 0.051  | 0.051              |
| <b>13</b>         |          |        |        |        |        |                    |
| HOMO (Hartree)    | -0.217   | -0.208 | -0.22  | -0.228 |        | -0.210             |
| Hardness          | 0.102    | 0.094  | 0.104  | 0.108  |        | 0.095              |
| Softness          | 4.902    | 5.348  | 4.831  | 4.651  |        | 5.286              |
| Electronegativity | -0.115   | -0.115 | -0.117 | -0.121 |        | -0.115             |
| Electrophilicity  | 0.051    | 0.047  | 0.052  | 0.054  |        | 0.047              |
| <b>15</b>         |          |        |        |        |        |                    |
| HOMO              | -0.220   | -0.204 | -0.218 | -0.219 | -0.214 | -0.216             |
| Hardness          | 0.103    | 0.096  | 0.104  | 0.105  | 0.102  | 0.101              |
| Softness          | 4.854    | 5.236  | 4.808  | 4.785  | 4.926  | 4.935              |
| Electronegativity | -0.117   | -0.109 | -0.114 | -0.115 | -0.113 | -0.115             |
| Electrophilicity  | 0.052    | 0.048  | 0.052  | 0.052  | 0.051  | 0.051              |

**Table S4.** Normalised Fukui indices of the alkoxide oxygen and carbonyl carbon ground states using B3LYP/6-31G\*\*.

| Normalised Fukui indices | <b>9</b> |          |         |         |         |         |        | Boltzmann Weighted |
|--------------------------|----------|----------|---------|---------|---------|---------|--------|--------------------|
|                          | GS1      | GS2      | GS3     | GS4     | GS5     | GS6     | GS7    |                    |
| $f^+$ (carbonyl C)       | -18.406  | -11.435  | -25.531 | -74.143 | -74.143 | -8.800  | -8.836 | -17.428            |
| $f^-$ (alkoxide O)       | -1.462   | -1.492   | -1.428  | -1.411  | -1.411  | -1.407  | -1.726 | -1.457             |
| <b>12</b>                |          |          |         |         |         |         |        |                    |
| $f^+$ (carbonyl C)       | -10.972  | -11.284  | -15.353 | -8.448  | -14.118 | -23.137 |        | -11.769            |
| $f^-$ (alkoxide O)       | -1.462   | -1.442   | -1.401  | -1.461  | -1.439  | -1.754  |        | -1.446             |
| <b>13</b>                |          |          |         |         |         |         |        |                    |
| $f^+$ (carbonyl C)       | -115.019 |          |         |         |         |         |        | -115.019           |
| $f^-$ (alkoxide O)       | -1.456   |          |         |         |         |         |        | -1.456             |
| <b>15</b>                |          |          |         |         |         |         |        |                    |
| $f^+$ (carbonyl C)       | -154.384 | -154.264 | -23.479 | -9.919  | -9.799  |         |        | -10.779            |
| $f^-$ (alkoxide O)       | -1.766   | -1.766   | -1.423  | -1.404  | -1.398  |         |        | -1.402             |

**Table S5.** Normalised Fukui indices of the alkoxide oxygen and carbonyl carbon transition states states using B3LYP/6-31G\*\*.

| Normalised Fukui indices | <b>9</b> |         |          |         |         | Boltzmann Weighted |
|--------------------------|----------|---------|----------|---------|---------|--------------------|
|                          | TS1      | TS2     | TS3      | TS4     | TS5     |                    |
| $f^+$ (carbonyl C)       | -83.947  | -9.797  | -20.853  | -8.144  | -16.448 | -21.962            |
| $f$ (alkoxide O)         | -5.223   | -0.741  | -1.720   | -0.070  | -0.017  | -0.672             |
| <b>12</b>                |          |         |          |         |         |                    |
| $f^+$ (carbonyl C)       | -95.382  | -97.284 | -83.687  | -29.182 | -95.382 | -26.487            |
| $f$ (alkoxide O)         | -0.886   | -0.902  | -1.422   | -0.061  | -0.886  | -0.049             |
| <b>13</b>                |          |         |          |         |         |                    |
| $f^+$ (carbonyl C)       | -30.967  | -14.687 | -16.160  | -29.249 |         | -15.974            |
| $f$ (alkoxide O)         | -1.652   | -1.766  | -1.063   | -1.403  |         | -1.734             |
| <b>15</b>                |          |         |          |         |         |                    |
| $f^+$ (carbonyl C)       | -228.199 | -14.850 | -174.404 | -20.142 | -13.135 | -169.771           |
| $f$ (alkoxide O)         | -1.125   | -1.796  | -0.018   | -0.019  | -0.011  | -1.129             |

Coordinates in xyz format of the ground and transition states of molecules 9, 12, 13, & 15.

|            |          |          |          |     |          |          |          |
|------------|----------|----------|----------|-----|----------|----------|----------|
|            |          |          |          | C   | -0.02049 | 2.43986  | -0.04698 |
| Molecule 9 |          |          |          | O   | -1.43188 | -2.09937 | -0.05959 |
|            |          |          |          | O   | 1.48900  | -1.02648 | 1.91564  |
| 36         |          |          |          | H   | 1.32931  | -0.39055 | 2.66399  |
| gs1        |          |          |          | O   | -1.96498 | -2.19911 | 2.43143  |
| C          | -2.93113 | -2.13433 | -0.62249 | H   | -1.95798 | -2.25107 | 1.39395  |
| C          | -1.95891 | -1.17813 | -2.70445 | C   | -0.28844 | 1.20683  | 3.20673  |
| O          | -2.21547 | 0.24157  | -0.68075 | O   | -0.64170 | 2.40650  | 3.12197  |
| C          | -1.49036 | 0.02505  | -1.84206 | O   | 0.78157  | 0.76477  | 3.73754  |
| C          | -2.43727 | -0.90955 | 0.18509  | C   | 1.03235  | 3.34645  | 0.59962  |
| C          | -2.01469 | -2.47068 | -1.82669 | H   | 0.80524  | 3.26825  | 1.67716  |
| H          | -1.14467 | -1.32864 | -3.46378 | H   | 0.82248  | 4.36841  | 0.26973  |
| H          | -1.55244 | 0.95191  | -2.41714 | C   | 2.48148  | 3.00104  | 0.32568  |
| H          | -3.27964 | -0.58467 | 0.80438  | C   | 5.20617  | 2.44199  | -0.17467 |
| H          | -2.56679 | -3.19829 | -2.44113 | C   | 3.31957  | 3.94772  | -0.28349 |
| H          | -2.95202 | -2.99223 | 0.07291  | C   | 3.03388  | 1.75587  | 0.68223  |
| O          | -0.05360 | -0.18314 | -1.46947 | C   | 4.37942  | 1.48832  | 0.42826  |
| C          | 0.64274  | 0.81447  | -0.92972 | C   | 4.66840  | 3.67863  | -0.53184 |
| O          | -3.19182 | -0.89464 | -3.22082 | H   | 2.90436  | 4.91403  | -0.56623 |
| O          | -0.77441 | -3.05967 | -1.47091 | H   | 2.40662  | 0.98997  | 1.13157  |
| H          | -0.52737 | -2.68498 | -0.58560 | H   | 4.78026  | 0.51659  | 0.70772  |
| O          | -4.23964 | -1.88627 | -1.11515 | H   | 5.29375  | 4.43475  | -1.00527 |
| H          | -4.02552 | -1.40499 | -2.01122 | H   | 6.25553  | 2.22179  | -0.36545 |
| C          | -1.21439 | -1.07325 | 1.15632  | O   | -0.92938 | 2.87049  | -0.73669 |
| O          | -1.13468 | -0.20366 | 2.06061  |     |          |          |          |
| O          | -0.39397 | -2.02697 | 0.96134  | 36  |          |          |          |
| C          | 1.80778  | 0.22278  | -0.11359 | gs3 |          |          |          |
| H          | 2.59710  | -0.05138 | -0.82749 | C   | -1.75144 | -1.16367 | 0.70908  |
| H          | 1.42609  | -0.70377 | 0.33303  | C   | -0.87114 | -0.08255 | -1.34833 |
| C          | 2.34961  | 1.14841  | 0.94723  | O   | -1.04553 | 1.24238  | 0.76284  |
| C          | 3.35265  | 2.83667  | 2.96756  | C   | -0.43929 | 1.12263  | -0.46937 |
| C          | 3.52063  | 1.89082  | 0.74979  | C   | -1.32381 | 0.05143  | 1.56803  |
| C          | 1.67598  | 1.26182  | 2.17710  | C   | -0.81974 | -1.39484 | -0.50945 |
| C          | 2.17993  | 2.10145  | 3.17158  | H   | -0.08044 | -0.16404 | -2.14038 |
| C          | 4.02352  | 2.72929  | 1.74848  | H   | -0.62554 | 2.05050  | -1.01107 |
| H          | 4.04578  | 1.80916  | -0.20066 | H   | -2.20504 | 0.35217  | 2.14176  |
| H          | 0.75505  | 0.68759  | 2.32987  | H   | -1.31334 | -2.15548 | -1.13399 |
| H          | 1.64910  | 2.18221  | 4.11854  | H   | -1.71284 | -2.04614 | 1.37263  |
| H          | 4.93708  | 3.29611  | 1.57321  | O   | 1.06669  | 1.09056  | -0.22745 |
| H          | 3.73875  | 3.48741  | 3.75110  | C   | 1.83918  | 2.08100  | -0.62649 |
| O          | 0.43560  | 2.00650  | -1.06958 | O   | -2.13353 | 0.15662  | -1.81569 |
|            |          |          |          | O   | 0.47458  | -1.86941 | -0.18278 |
| 36         |          |          |          | H   | 0.70177  | -1.49126 | 0.71128  |
| gs2        |          |          |          | O   | -3.07570 | -0.98996 | 0.23230  |
| C          | -0.86171 | -1.34255 | 2.67453  | H   | -2.90078 | -0.45646 | -0.64765 |
| C          | -0.40130 | -1.24954 | 0.23133  | C   | -0.17131 | -0.16750 | 2.60534  |
| O          | -1.78875 | 0.50530  | 1.32707  | O   | 0.81693  | -0.89594 | 2.24784  |
| C          | -0.95628 | 0.20127  | 0.26226  | O   | -0.29293 | 0.41326  | 3.70743  |
| C          | -1.30117 | 0.14019  | 2.64389  | C   | 3.27117  | 1.89126  | -0.08679 |
| C          | 0.22826  | -1.62379 | 1.61114  | H   | 3.94349  | 2.48260  | -0.71649 |
| H          | 0.42891  | -1.23227 | -0.52429 | H   | 3.52645  | 0.83049  | -0.18551 |
| H          | -1.53014 | 0.39436  | -0.64582 | C   | 3.39049  | 2.31918  | 1.36585  |
| H          | -2.20329 | 0.21360  | 3.26560  | C   | 3.50211  | 3.15984  | 4.04790  |
| H          | 0.36146  | -2.71663 | 1.56852  | C   | 2.71008  | 1.60668  | 2.36483  |
| H          | -0.45739 | -1.53349 | 3.68172  | C   | 4.13818  | 3.44767  | 1.72982  |
| O          | 0.19018  | 1.16825  | 0.27893  | C   | 4.20429  | 3.86086  | 3.06373  |

|         |          |          |          |         |          |          |          |
|---------|----------|----------|----------|---------|----------|----------|----------|
| C       | 2.75166  | 2.03532  | 3.69199  | O       | -1.85894 | -0.50915 | 1.26163  |
| H       | 2.12878  | 0.71753  | 2.12049  | C       | -0.59610 | -0.75139 | 0.77793  |
| H       | 4.66586  | 4.01133  | 0.96144  | C       | -2.00606 | -0.09322 | 2.66109  |
| H       | 4.79274  | 4.73857  | 3.32917  | C       | 0.38198  | -0.94988 | 3.11184  |
| H       | 2.14947  | 1.48643  | 4.41124  | H       | 1.36257  | -1.49602 | 1.25348  |
| H       | 3.53410  | 3.49585  | 5.08346  | H       | -0.70381 | -1.24314 | -0.19313 |
| O       | 1.52902  | 3.04313  | -1.31588 | H       | -3.03179 | -0.39814 | 2.88655  |
| 36      |          |          |          | H       | 0.90264  | -1.68137 | 3.74978  |
| gs4.out |          |          |          | H       | -1.12713 | -0.39804 | 4.58981  |
| C       | -1.08610 | -0.90092 | 3.60770  | O       | -0.00333 | 0.61899  | 0.52213  |
| C       | 0.33788  | -1.59793 | 1.69402  | C       | 1.12894  | 0.80163  | -0.11800 |
| O       | -1.85894 | -0.50915 | 1.26163  | O       | -0.13859 | -2.87517 | 1.73619  |
| C       | -0.59610 | -0.75139 | 0.77793  | O       | 1.07173  | 0.28989  | 3.20407  |
| C       | -2.00606 | -0.09322 | 2.66109  | H       | 0.37027  | 1.01243  | 3.14536  |
| C       | 0.38198  | -0.94988 | 3.11184  | O       | -1.55442 | -2.23399 | 3.74493  |
| H       | 1.36257  | -1.49602 | 1.25348  | H       | -1.10062 | -2.68931 | 2.92959  |
| H       | -0.70381 | -1.24314 | -0.19313 | C       | -1.97776 | 1.47503  | 2.80174  |
| H       | -3.03179 | -0.39814 | 2.88655  | O       | -0.86113 | 2.02953  | 3.08171  |
| H       | 0.90264  | -1.68137 | 3.74978  | O       | -3.07595 | 2.05251  | 2.65282  |
| H       | -1.12713 | -0.39804 | 4.58981  | C       | 1.81774  | 2.03909  | 0.47381  |
| O       | -0.00333 | 0.61899  | 0.52213  | H       | 2.25860  | 1.63589  | 1.40007  |
| C       | 1.12894  | 0.80163  | -0.11800 | H       | 1.04151  | 2.72462  | 0.82497  |
| O       | -0.13859 | -2.87517 | 1.73619  | C       | 2.84579  | 2.73600  | -0.37740 |
| O       | 1.07173  | 0.28989  | 3.20407  | C       | 4.80280  | 4.09568  | -1.90385 |
| H       | 0.37027  | 1.01243  | 3.14536  | C       | 3.84738  | 2.02802  | -1.06568 |
| O       | -1.55442 | -2.23399 | 3.74493  | C       | 2.84688  | 4.13578  | -0.47973 |
| H       | -1.10062 | -2.68931 | 2.92959  | C       | 3.81228  | 4.81161  | -1.22953 |
| C       | -1.97776 | 1.47503  | 2.80174  | C       | 4.81045  | 2.70043  | -1.81858 |
| O       | -0.86113 | 2.02953  | 3.08171  | H       | 3.83163  | 0.94514  | -1.02223 |
| O       | -3.07595 | 2.05251  | 2.65282  | H       | 2.07572  | 4.69860  | 0.04151  |
| C       | 1.81774  | 2.03909  | 0.47381  | H       | 3.78753  | 5.89843  | -1.28782 |
| H       | 2.25860  | 1.63589  | 1.40007  | H       | 5.57372  | 2.12965  | -2.34476 |
| H       | 1.04151  | 2.72462  | 0.82497  | H       | 5.55741  | 4.61691  | -2.49017 |
| C       | 2.84579  | 2.73600  | -0.37740 | O       | 1.60447  | 0.09598  | -1.00105 |
| C       | 4.80280  | 4.09568  | -1.90385 | 36      |          |          |          |
| C       | 3.84738  | 2.02802  | -1.06568 | gs6.out |          |          |          |
| C       | 2.84688  | 4.13578  | -0.47973 | C       | -1.54201 | -1.09226 | 2.17086  |
| C       | 3.81228  | 4.81161  | -1.22953 | C       | 0.84788  | -0.90124 | 2.83998  |
| C       | 4.81045  | 2.70043  | -1.81858 | O       | 0.26767  | -1.68968 | 0.54057  |
| H       | 3.83163  | 0.94514  | -1.02223 | C       | 1.23350  | -1.13097 | 1.35570  |
| H       | 2.07572  | 4.69860  | 0.04151  | C       | -1.14107 | -1.32447 | 0.69009  |
| H       | 3.78753  | 5.89843  | -1.28782 | C       | -0.53236 | -0.17277 | 2.90235  |
| H       | 5.57372  | 2.12965  | -2.34476 | H       | 1.61842  | -0.18530 | 3.22970  |
| H       | 5.55741  | 4.61691  | -2.49017 | H       | 2.10800  | -1.78382 | 1.29080  |
| O       | 1.60447  | 0.09598  | -1.00105 | H       | -1.66315 | -2.22888 | 0.36820  |
| 36      |          |          |          | H       | -0.81395 | -0.17243 | 3.96546  |
| gs5.out |          |          |          | H       | -2.53458 | -0.60652 | 2.15426  |
| C       | -1.08610 | -0.90092 | 3.60770  | O       | 1.64800  | 0.20255  | 0.80345  |
| C       | 0.33788  | -1.59793 | 1.69402  | C       | 2.19438  | 0.30213  | -0.39806 |
|         |          |          |          | O       | 0.80019  | -2.10037 | 3.49397  |

|         |          |          |          |         |          |          |          |
|---------|----------|----------|----------|---------|----------|----------|----------|
| O       | -0.56569 | 1.17820  | 2.45105  | C       | 0.29711  | -0.13210 | -1.21207 |
| H       | -0.70869 | 1.15639  | 1.46003  | C       | 2.22908  | -1.51561 | -1.67154 |
| O       | -1.63037 | -2.31892 | 2.87085  | C       | 1.57934  | -2.07459 | -2.77314 |
| H       | -0.64138 | -2.44012 | 3.19083  | C       | -0.34730 | -0.69567 | -2.31785 |
| C       | -1.55768 | -0.19779 | -0.31886 | H       | -0.22257 | 0.61463  | -0.60377 |
| O       | -1.05863 | 0.96870  | -0.13853 | H       | 3.22588  | -1.84933 | -1.39587 |
| O       | -2.36315 | -0.52939 | -1.21251 | H       | 2.08222  | -2.83295 | -3.37195 |
| C       | 1.93985  | 1.70400  | -0.97058 | H       | -1.35620 | -0.36743 | -2.55814 |
| H       | 0.84130  | 1.74753  | -1.04917 | H       | -0.22343 | -2.09226 | -3.96520 |
| H       | 2.38538  | 1.73819  | -1.96922 | O       | 2.84441  | -1.96633 | 1.43153  |
| C       | 2.44296  | 2.86023  | -0.13239 |         |          |          |          |
| C       | 3.38790  | 5.05601  | 1.37316  | 36      |          |          |          |
| C       | 3.43342  | 3.71614  | -0.63732 | ts1.out |          |          |          |
| C       | 1.92755  | 3.12150  | 1.15215  | C       | 2.18056  | 3.76453  | -0.69361 |
| C       | 2.40222  | 4.20754  | 1.88832  | C       | 2.06431  | 1.82443  | 0.84421  |
| C       | 3.90426  | 4.80486  | 0.10190  | O       | 1.92096  | 1.40188  | -1.52837 |
| H       | 3.83999  | 3.52423  | -1.62908 | C       | 1.37890  | 1.06041  | -0.27399 |
| H       | 1.17104  | 2.46400  | 1.57732  | C       | 1.64643  | 2.78474  | -1.80125 |
| H       | 1.99219  | 4.38988  | 2.87938  | C       | 1.72842  | 3.30490  | 0.69713  |
| H       | 4.67349  | 5.45251  | -0.31687 | H       | 3.15753  | 1.72569  | 0.64584  |
| H       | 3.74903  | 5.90140  | 1.95684  | H       | 0.28842  | 1.26758  | -0.27202 |
| O       | 2.78278  | -0.57175 | -1.01334 | H       | 0.54917  | 2.93413  | -1.81771 |
|         |          |          |          | H       | 0.63390  | 3.43688  | 0.76005  |
| 36      |          |          |          | H       | 3.28641  | 3.72599  | -0.71020 |
| gs7.out |          |          |          | O       | 1.60407  | -0.29627 | 0.02742  |
| C       | 0.39094  | 3.54147  | 2.74127  | C       | 1.37643  | -0.55235 | 1.44620  |
| C       | 2.17243  | 1.78032  | 3.31417  | O       | 1.68136  | 1.23528  | 2.03173  |
| O       | 0.20215  | 1.16354  | 1.98330  | O       | 2.35611  | 4.05058  | 1.75243  |
| C       | 1.08935  | 0.72335  | 2.99608  | H       | 2.29040  | 3.42694  | 2.49509  |
| C       | -0.53078 | 2.35127  | 2.32384  | O       | 1.71267  | 5.07142  | -0.96647 |
| C       | 1.35406  | 3.03225  | 3.80161  | H       | 1.80660  | 5.10267  | -1.96589 |
| H       | 2.57182  | 2.07632  | 2.29495  | C       | 2.17047  | 3.19103  | -3.22472 |
| H       | 0.53558  | 0.47438  | 3.91548  | O       | 2.08302  | 4.44992  | -3.44897 |
| H       | -1.16299 | 2.13568  | 3.20476  | O       | 2.57547  | 2.31063  | -3.99816 |
| H       | 0.73226  | 2.70947  | 4.66430  | C       | 2.67945  | -1.19378 | 1.98673  |
| H       | 0.97040  | 3.86352  | 1.85588  | H       | 3.51977  | -0.54568 | 1.72084  |
| O       | 1.60396  | -0.58013 | 2.61313  | H       | 2.81876  | -2.13876 | 1.44186  |
| C       | 2.28963  | -0.88130 | 1.50509  | C       | 2.68094  | -1.46749 | 3.47193  |
| O       | 3.11375  | 1.48137  | 4.21740  | C       | 2.76261  | -1.95266 | 6.25629  |
| O       | 2.34184  | 3.94597  | 4.24053  | C       | 2.94001  | -2.74802 | 3.97887  |
| H       | 3.02465  | 3.24696  | 4.48223  | C       | 2.45288  | -0.42705 | 4.39136  |
| O       | -0.42058 | 4.60346  | 3.22488  | C       | 2.49507  | -0.67017 | 5.76316  |
| H       | -1.20658 | 4.55940  | 2.61844  | C       | 2.98285  | -2.99408 | 5.35500  |
| C       | -1.49480 | 2.74920  | 1.15910  | H       | 3.11038  | -3.56649 | 3.28134  |
| O       | -1.55330 | 2.04147  | 0.13195  | H       | 2.23303  | 0.55533  | 3.97867  |
| O       | -2.16114 | 3.80648  | 1.40345  | H       | 2.31388  | 0.14821  | 6.45839  |
| C       | 2.31489  | 0.07749  | 0.30600  | H       | 3.18670  | -4.00008 | 5.71985  |
| H       | 3.37553  | 0.22284  | 0.07057  | H       | 2.79362  | -2.13667 | 7.32920  |
| H       | 1.86874  | 1.03592  | 0.55465  | O       | 0.27382  | -0.93426 | 1.82652  |
| C       | 1.60202  | -0.53538 | -0.88775 |         |          |          |          |
| C       | 0.28552  | -1.66180 | -3.10361 | 36      |          |          |          |



|         |         |          |          |         |          |          |          |
|---------|---------|----------|----------|---------|----------|----------|----------|
| ts2.out |         |          |          | O       | 1.43364  | 0.52401  | 0.45362  |
| C       | 1.68174 | 4.13736  | -0.67061 | C       | 0.49608  | 0.48627  | 1.48870  |
| C       | 2.15090 | 2.24272  | 0.83779  | O       | 1.09783  | 2.57109  | 2.11019  |
| O       | 2.29091 | 1.84457  | -1.53625 | O       | 2.27069  | 5.04908  | 1.59361  |
| C       | 1.81113 | 1.32159  | -0.32229 | H       | 1.84072  | 4.54629  | 2.31591  |
| C       | 1.58244 | 3.06327  | -1.81776 | O       | 2.90618  | 5.51151  | -1.30892 |
| C       | 1.33485 | 3.51931  | 0.69081  | H       | 3.33700  | 5.29603  | -2.18750 |
| H       | 3.21755 | 2.51874  | 0.69515  | C       | 3.69347  | 3.10500  | -2.87518 |
| H       | 0.71679 | 1.16373  | -0.39229 | O       | 3.95143  | 4.27213  | -3.33582 |
| H       | 0.50262 | 2.83324  | -1.90444 | O       | 4.14541  | 2.01851  | -3.26804 |
| H       | 0.25917 | 3.27215  | 0.69013  | C       | 1.11713  | -0.11282 | 2.76207  |
| H       | 2.73230 | 4.48033  | -0.61639 | H       | 0.42609  | 0.10245  | 3.58093  |
| O       | 2.43171 | 0.10974  | 0.04215  | H       | 2.04450  | 0.42944  | 2.95345  |
| C       | 1.95309 | -0.19478 | 1.38576  | C       | 1.36937  | -1.60415 | 2.67402  |
| O       | 1.95924 | 1.51258  | 2.00523  | C       | 1.87544  | -4.38447 | 2.53260  |
| O       | 1.61246 | 4.41427  | 1.78222  | C       | 2.28500  | -2.12751 | 1.74223  |
| H       | 1.70489 | 3.79443  | 2.52417  | C       | 0.71175  | -2.50745 | 3.52204  |
| O       | 0.81065 | 5.21144  | -0.96839 | C       | 0.95949  | -3.88143 | 3.45710  |
| H       | 0.95392 | 5.30250  | -1.95871 | C       | 2.53297  | -3.49750 | 1.67343  |
| C       | 2.01832 | 3.66238  | -3.20233 | H       | 2.77424  | -1.43955 | 1.05926  |
| O       | 1.53113 | 4.82825  | -3.41915 | H       | -0.00562 | -2.12213 | 4.24379  |
| O       | 2.72967 | 2.98711  | -3.96039 | H       | 0.43399  | -4.55825 | 4.12928  |
| C       | 3.10727 | -0.82710 | 2.21770  | H       | 3.24289  | -3.87649 | 0.94102  |
| H       | 3.09867 | -1.89708 | 1.96919  | H       | 2.07211  | -5.45354 | 2.47716  |
| H       | 2.76371 | -0.74367 | 3.25475  | O       | -0.70729 | 0.50041  | 1.28809  |
| C       | 4.51813 | -0.30524 | 2.10521  |         |          |          |          |
| C       | 7.19215 | 0.61545  | 2.01493  | 36      |          |          |          |
| C       | 4.84938 | 0.99643  | 2.52123  | ts4.out |          |          |          |
| C       | 5.55513 | -1.12476 | 1.63624  | C       | 2.61287  | 3.93845  | -0.57736 |
| C       | 6.87738 | -0.67538 | 1.58920  | C       | 2.28698  | 1.90693  | 0.82994  |
| C       | 6.16721 | 1.44843  | 2.47600  | O       | 1.43448  | 1.88904  | -1.43085 |
| H       | 4.02859 | 1.63455  | 2.83800  | C       | 1.14157  | 1.53319  | -0.09623 |
| H       | 5.31810 | -2.13273 | 1.30016  | C       | 1.53122  | 3.31799  | -1.53244 |
| H       | 7.66025 | -1.33415 | 1.21575  | C       | 2.39955  | 3.43181  | 0.85171  |
| H       | 6.39664 | 2.46402  | 2.79361  | H       | 3.20488  | 1.53141  | 0.32416  |
| H       | 8.21944 | 0.97370  | 1.97603  | H       | 0.20426  | 2.03943  | 0.21068  |
| O       | 0.83060 | -0.69518 | 1.52759  | H       | 0.56904  | 3.76505  | -1.21249 |
|         |         |          |          | H       | 1.44964  | 3.86470  | 1.21809  |
| 36      |         |          |          | H       | 3.60688  | 3.58725  | -0.91263 |
| ts3.out |         |          |          | O       | 0.94286  | 0.13341  | 0.02218  |
| C       | 2.96417 | 4.25334  | -0.65927 | C       | 1.55683  | -0.50487 | 1.12722  |
| C       | 1.92614 | 2.74271  | 1.04252  | O       | 2.55649  | -1.18684 | 0.96068  |
| O       | 2.51340 | 1.81634  | -1.12411 | C       | 0.57456  | -0.92031 | 2.24854  |
| C       | 1.53693 | 1.83483  | -0.11823 | H       | 0.37178  | -1.98861 | 2.08255  |
| C       | 2.64538 | 3.12549  | -1.70601 | H       | 1.16550  | -0.84997 | 3.16667  |
| C       | 1.96636 | 4.17913  | 0.49718  | C       | -0.73945 | -0.19601 | 2.42424  |
| H       | 2.99475 | 2.46899  | 1.25277  | C       | -3.20703 | 1.10489  | 2.87248  |
| H       | 0.55027 | 2.11432  | -0.53250 | C       | -1.95627 | -0.87643 | 2.27478  |
| H       | 1.67540 | 3.41153  | -2.15710 | C       | -0.77903 | 1.15902  | 2.79979  |
| H       | 0.96882 | 4.43705  | 0.09429  | C       | -2.00014 | 1.79718  | 3.01793  |
| H       | 3.97428 | 4.06540  | -0.24916 | C       | -3.18014 | -0.23824 | 2.49520  |

|   |          |          |          |   |          |         |          |
|---|----------|----------|----------|---|----------|---------|----------|
| H | -1.94325 | -1.92469 | 1.97979  | O | -1.63145 | 1.59901 | -4.39226 |
| H | 0.18056  | 1.67473  | 2.86056  |   |          |         |          |
| H | -2.01072 | 2.84901  | 3.29811  |   |          |         |          |
| H | -4.11038 | -0.79047 | 2.36870  |   |          |         |          |
| H | -4.15681 | 1.60943  | 3.04276  |   |          |         |          |
| O | 2.09809  | 1.31587  | 2.05623  |   |          |         |          |
| O | 3.45800  | 3.79241  | 1.75027  |   |          |         |          |
| H | 3.40029  | 3.06217  | 2.39422  |   |          |         |          |
| O | 2.52597  | 5.35070  | -0.63041 |   |          |         |          |
| H | 2.36044  | 5.49432  | -1.61019 |   |          |         |          |
| C | 1.74508  | 3.76237  | -3.02391 |   |          |         |          |
| O | 2.01255  | 5.01042  | -3.14186 |   |          |         |          |
| O | 1.60707  | 2.92976  | -3.93222 |   |          |         |          |

36

ts5.out

|   |          |          |          |
|---|----------|----------|----------|
| C | -0.52375 | 3.39131  | -1.42002 |
| C | 0.87232  | 1.73755  | -0.15279 |
| O | -0.43217 | 0.95784  | -2.05233 |
| C | -0.02934 | 0.65772  | -0.74193 |
| C | -1.24016 | 2.14778  | -2.05621 |
| C | 0.02513  | 3.01561  | -0.04351 |
| H | 1.62821  | 1.93589  | -0.95511 |
| H | -0.92808 | 0.51159  | -0.10675 |
| H | -2.13446 | 1.97062  | -1.42621 |
| H | -0.84206 | 2.81126  | 0.61402  |
| H | 0.33204  | 3.66190  | -2.06645 |
| O | 0.73742  | -0.54330 | -0.76488 |
| C | 1.41599  | -0.85262 | 0.39954  |
| O | 2.52633  | -1.36457 | 0.31257  |
| C | 0.56266  | -1.09271 | 1.66009  |
| H | 1.19878  | -0.78116 | 2.49260  |
| H | -0.31170 | -0.44406 | 1.67978  |
| C | 0.15713  | -2.54516 | 1.83378  |
| C | -0.59959 | -5.24271 | 2.22961  |
| C | 1.11815  | -3.57233 | 1.85128  |
| C | -1.18713 | -2.90490 | 2.00787  |
| C | -1.56534 | -4.23559 | 2.20561  |
| C | 0.74428  | -4.90149 | 2.04542  |
| H | 2.15303  | -3.29608 | 1.67464  |
| H | -1.94652 | -2.12652 | 1.98374  |
| H | -2.61710 | -4.48425 | 2.33635  |
| H | 1.50619  | -5.67949 | 2.05020  |
| H | -0.88938 | -6.28071 | 2.38265  |
| O | 1.42057  | 1.33171  | 1.02474  |
| O | 0.84208  | 4.02598  | 0.55779  |
| H | 1.40436  | 3.46076  | 1.12574  |
| O | -1.44958 | 4.45992  | -1.32693 |
| H | -1.94119 | 4.36554  | -2.19545 |
| C | -1.77353 | 2.45074  | -3.50215 |
| O | -2.35953 | 3.58630  | -3.59156 |

|             |          |          |          |         |          |          |          |
|-------------|----------|----------|----------|---------|----------|----------|----------|
| Molecule 12 |          |          |          | C       | -2.11528 | -0.35339 | 1.62947  |
|             |          |          |          | H       | -0.69125 | -1.16056 | 3.06461  |
| 39          |          |          |          | H       | 1.04062  | -1.83472 | 1.35488  |
| gs1.out     |          |          |          | H       | -1.15817 | -0.55353 | -1.70365 |
| C           | -3.31266 | -1.54051 | 0.18891  | H       | -3.02858 | -0.76428 | 2.08841  |
| C           | -1.91023 | -0.83733 | 2.12133  | H       | -3.04583 | 0.27939  | -0.24183 |
| O           | -1.13055 | -2.63585 | 0.59674  | O       | 0.89106  | 0.25564  | 1.53632  |
| C           | -0.74564 | -1.61321 | 1.44755  | C       | 1.92308  | 0.36249  | 2.34403  |
| C           | -2.10046 | -2.27960 | -0.42748 | O       | -1.38532 | -2.64822 | 1.74861  |
| C           | -2.88886 | -0.30338 | 1.02281  | O       | -1.93990 | 0.97581  | 2.10026  |
| H           | -1.42877 | 0.05703  | 2.60108  | H       | -1.62317 | 1.51163  | 1.32448  |
| H           | -0.09465 | -2.06551 | 2.19998  | O       | -2.77694 | -1.77265 | -0.20167 |
| H           | -2.46768 | -3.25606 | -0.76380 | H       | -2.25598 | -2.33561 | 0.49764  |
| H           | -3.78148 | 0.01987  | 1.58019  | C       | -0.51932 | 1.30744  | -0.82441 |
| H           | -3.95362 | -1.21897 | -0.65016 | O       | -1.08637 | 2.19045  | -0.10128 |
| O           | 0.06093  | -0.62639 | 0.66867  | O       | 0.39348  | 1.50547  | -1.66136 |
| C           | 1.24255  | -0.94346 | 0.14963  | C       | 2.30901  | 1.84655  | 2.53876  |
| O           | -2.56582 | -1.67345 | 2.97878  | H       | 2.82424  | 1.87261  | 3.50708  |
| O           | -2.44185 | 0.79731  | 0.23575  | C       | 3.31147  | 2.28724  | 1.47624  |
| H           | -2.13626 | 0.41543  | -0.63338 | C       | 5.17574  | 3.16613  | -0.44942 |
| O           | -4.03926 | -2.41863 | 1.03454  | C       | 2.97941  | 2.28182  | 0.10906  |
| H           | -3.52961 | -2.29889 | 1.93242  | C       | 4.58639  | 2.73284  | 1.85368  |
| C           | -1.36268 | -1.63323 | -1.65680 | C       | 5.51385  | 3.17106  | 0.90475  |
| O           | -1.65515 | -0.42911 | -1.97013 | C       | 3.90903  | 2.71865  | -0.83603 |
| O           | -0.52424 | -2.36248 | -2.23101 | H       | 2.00639  | 1.93831  | -0.24541 |
| C           | 1.54329  | -0.00062 | -1.04048 | H       | 4.85393  | 2.73522  | 2.90922  |
| H           | 0.58965  | 0.07130  | -1.58088 | H       | 6.49720  | 3.51300  | 1.22517  |
| C           | 1.88253  | 1.39454  | -0.52584 | H       | 3.62314  | 2.70326  | -1.88485 |
| C           | 2.44728  | 3.99233  | 0.43462  | H       | 5.89290  | 3.50559  | -1.19544 |
| C           | 3.17861  | 1.92552  | -0.59073 | O       | 2.54053  | -0.54669 | 2.88293  |
| C           | 0.86517  | 2.19065  | 0.03880  | C       | 1.07360  | 2.76853  | 2.57836  |
| C           | 1.15089  | 3.47111  | 0.51054  | H       | 1.37636  | 3.78539  | 2.86249  |
| C           | 3.46151  | 3.21107  | -0.11775 | H       | 0.33704  | 2.39631  | 3.29679  |
| H           | 3.97884  | 1.32851  | -1.01904 | H       | 0.56820  | 2.79973  | 1.60886  |
| H           | -0.14369 | 1.78849  | 0.12215  |         |          |          |          |
| H           | 0.34971  | 4.06676  | 0.94309  | 39      |          |          |          |
| H           | 4.47788  | 3.59807  | -0.18160 | gs3.out |          |          |          |
| H           | 2.66213  | 4.99410  | 0.80358  | C       | -1.70943 | -0.38991 | -1.10541 |
| O           | 1.99978  | -1.81356 | 0.54096  | C       | -1.63379 | -0.07906 | 1.36240  |
| C           | 2.57721  | -0.64276 | -1.96565 | O       | 0.02215  | -1.58731 | 0.25531  |
| H           | 2.85849  | 0.03957  | -2.77770 | C       | -0.26996 | -0.81640 | 1.36377  |
| H           | 2.11875  | -1.53480 | -2.40018 | C       | -0.34589 | -1.12932 | -1.08516 |
| H           | 3.47869  | -0.94502 | -1.42162 | C       | -1.80327 | 0.68255  | 0.00884  |
|             |          |          |          | H       | -1.54358 | 0.69488  | 2.16926  |
| 39          |          |          |          | H       | -0.19990 | -1.47968 | 2.22966  |
| gs2.out     |          |          |          | H       | -0.49529 | -2.06509 | -1.62929 |
| C           | -2.30600 | -0.46672 | 0.09498  | H       | -2.84042 | 1.04871  | 0.01070  |
| C           | -0.98943 | -1.36694 | 2.00216  | H       | -1.78548 | 0.10021  | -2.09309 |
| O           | 0.09476  | -1.01954 | -0.20870 | O       | 0.79345  | 0.23252  | 1.53325  |
| C           | 0.28391  | -1.07333 | 1.15707  | C       | 2.04826  | -0.09754 | 1.78180  |
| C           | -1.00013 | -0.18255 | -0.68452 | O       | -2.64231 | -0.98282 | 1.54682  |

|         |          |          |          |         |          |          |          |
|---------|----------|----------|----------|---------|----------|----------|----------|
| O       | -0.95284 | 1.80393  | -0.20651 | C       | 2.10585  | -1.22018 | 2.18490  |
| H       | -0.10534 | 1.45706  | -0.61351 | C       | 2.30622  | -3.95909 | 2.86085  |
| O       | -2.78020 | -1.30212 | -0.94871 | C       | 1.40379  | -1.75182 | 3.27706  |
| H       | -2.85654 | -1.34654 | 0.09382  | C       | 2.90745  | -2.09438 | 1.42993  |
| C       | 0.85117  | -0.40216 | -1.79306 | C       | 3.00325  | -3.44567 | 1.76320  |
| O       | 1.17448  | 0.76128  | -1.36337 | C       | 1.50216  | -3.10335 | 3.61568  |
| O       | 1.38787  | -1.01694 | -2.73713 | H       | 0.76960  | -1.09119 | 3.86346  |
| C       | 2.99105  | 1.03251  | 1.30120  | H       | 3.42394  | -1.69332 | 0.56381  |
| H       | 2.67398  | 1.16945  | 0.25501  | H       | 3.62491  | -4.10473 | 1.15932  |
| C       | 2.73340  | 2.34540  | 2.03778  | H       | 0.94442  | -3.48804 | 4.46774  |
| C       | 2.23698  | 4.79460  | 3.36558  | H       | 2.38365  | -5.01360 | 3.11935  |
| C       | 3.67561  | 2.90188  | 2.91602  | O       | 2.53478  | 0.22987  | -0.50065 |
| C       | 1.52417  | 3.04226  | 1.83753  | C       | 3.32433  | 1.00207  | 2.28795  |
| C       | 1.28712  | 4.24818  | 2.49612  | H       | 3.56202  | 0.78138  | 3.33649  |
| C       | 3.43455  | 4.11262  | 3.57371  | H       | 3.18729  | 2.08522  | 2.16988  |
| H       | 4.61622  | 2.38787  | 3.09140  | H       | 4.16075  | 0.66755  | 1.66433  |
| H       | 0.76001  | 2.62522  | 1.18426  |         |          |          |          |
| H       | 0.34435  | 4.76335  | 2.32550  | 39      |          |          |          |
| H       | 4.18706  | 4.51793  | 4.24912  | gs5.out |          |          |          |
| H       | 2.04362  | 5.73792  | 3.87402  | C       | -2.30778 | 0.14833  | -0.55428 |
| O       | 2.44937  | -1.13699 | 2.28110  | C       | -2.14137 | 0.49872  | 1.90114  |
| C       | 4.44315  | 0.55119  | 1.33207  | O       | -0.50774 | -0.97200 | 0.73933  |
| H       | 5.12420  | 1.32752  | 0.96296  | C       | -0.72445 | -0.13719 | 1.81692  |
| H       | 4.54526  | -0.33058 | 0.69484  | C       | -0.88618 | -0.46180 | -0.57309 |
| H       | 4.75369  | 0.25580  | 2.34021  | C       | -2.47942 | 1.21588  | 0.55722  |
|         |          |          |          | H       | -2.06216 | 1.29104  | 2.69286  |
| 39      |          |          |          | H       | -0.52112 | -0.71114 | 2.72243  |
| gs4.out |          |          |          | H       | -0.94604 | -1.37506 | -1.17582 |
| C       | -0.89201 | 4.43924  | -0.12787 | H       | -3.55794 | 1.43192  | 0.61682  |
| C       | -1.18470 | 2.20027  | -1.17162 | H       | -2.46584 | 0.61528  | -1.54161 |
| O       | 1.09270  | 3.16696  | -0.90664 | O       | 0.33720  | 0.93254  | 1.73214  |
| C       | 0.34623  | 2.00913  | -1.00537 | C       | 1.13219  | 1.22469  | 2.73850  |
| C       | 0.62508  | 4.18348  | 0.03176  | O       | -3.04189 | -0.49368 | 2.16211  |
| C       | -1.73047 | 3.13824  | -0.04785 | O       | -1.79582 | 2.43607  | 0.30945  |
| H       | -1.62986 | 1.18387  | -0.99882 | H       | -1.06132 | 2.22538  | -0.32703 |
| H       | 0.75033  | 1.44682  | -1.84928 | O       | -3.27411 | -0.87063 | -0.34817 |
| H       | 1.13348  | 5.08587  | -0.32329 | H       | -3.29582 | -0.91614 | 0.68949  |
| H       | -2.74691 | 3.40418  | -0.37775 | C       | 0.28774  | 0.38985  | -1.17804 |
| H       | -1.19008 | 5.11826  | 0.69039  | O       | 1.34341  | -0.24233 | -1.42321 |
| O       | 0.60722  | 1.18825  | 0.23973  | O       | 0.08804  | 1.63198  | -1.38004 |
| C       | 1.75495  | 0.55341  | 0.38742  | C       | 2.15567  | 2.30915  | 2.33001  |
| O       | -1.41704 | 2.73608  | -2.40726 | H       | 2.37954  | 2.84271  | 3.26252  |
| O       | -1.82608 | 2.58204  | 1.25223  | C       | 3.45249  | 1.66036  | 1.85519  |
| H       | -0.99060 | 2.83348  | 1.73203  | C       | 5.88028  | 0.52472  | 0.97710  |
| O       | -1.14900 | 5.06010  | -1.37952 | C       | 3.48291  | 0.84011  | 0.71283  |
| H       | -1.24735 | 4.23189  | -1.99651 | C       | 4.65093  | 1.89225  | 2.54516  |
| C       | 1.20583  | 3.88582  | 1.46158  | C       | 5.85721  | 1.33380  | 2.11426  |
| O       | 2.43663  | 4.10089  | 1.58933  | C       | 4.68941  | 0.28272  | 0.28628  |
| O       | 0.42041  | 3.44783  | 2.36185  | H       | 2.58130  | 0.61408  | 0.14105  |
| C       | 2.02580  | 0.26511  | 1.87748  | H       | 4.63537  | 2.51962  | 3.43498  |
| H       | 1.19955  | 0.71052  | 2.43715  | H       | 6.77414  | 1.53008  | 2.66860  |

|         |          |          |          |         |         |          |          |         |
|---------|----------|----------|----------|---------|---------|----------|----------|---------|
| H       | 4.68028  | -0.34699 | -0.59992 |         |         |          |          | ts1.out |
| H       | 6.81624  | 0.08552  | 0.63478  | C       | 2.10236 | 3.78691  | -0.66554 |         |
| O       | 1.12211  | 0.73294  | 3.85934  | C       | 2.09059 | 1.82705  | 0.85269  |         |
| C       | 1.58937  | 3.29411  | 1.28855  | O       | 2.01141 | 1.42201  | -1.52720 |         |
| H       | 2.30278  | 4.11288  | 1.12422  | C       | 1.47700 | 1.03298  | -0.28493 |         |
| H       | 0.63678  | 3.71020  | 1.63045  | C       | 1.65002 | 2.78711  | -1.79102 |         |
| H       | 1.38429  | 2.79612  | 0.33648  | C       | 1.65863 | 3.28348  | 0.71290  |         |
|         |          |          |          | H       | 3.19095 | 1.80325  | 0.67234  |         |
| 39      |          |          |          | H       | 0.37472 | 1.15888  | -0.29518 |         |
| gs6.out |          |          |          | H       | 0.54576 | 2.86365  | -1.82296 |         |
| C       | -0.94009 | 3.69491  | -0.47936 | H       | 0.55677 | 3.34122  | 0.75762  |         |
| C       | 1.03374  | 4.22027  | 1.08549  | H       | 3.20857 | 3.81965  | -0.66454 |         |
| O       | 0.62935  | 1.92969  | 0.28595  | O       | 1.79615 | -0.30818 | 0.00510  |         |
| C       | 1.08465  | 2.70849  | 1.37721  | C       | 1.53310 | -0.61355 | 1.40564  |         |
| C       | -0.73153 | 2.20022  | -0.09824 | O       | 1.72727 | 1.20072  | 2.02692  |         |
| C       | -0.46121 | 4.51917  | 0.70437  | O       | 2.21646 | 4.05949  | 1.78503  |         |
| H       | 1.61378  | 4.30168  | 0.11774  | H       | 2.17396 | 3.42856  | 2.52314  |         |
| H       | 0.51631  | 2.48007  | 2.29797  | O       | 1.55534 | 5.06353  | -0.93343 |         |
| H       | -1.39164 | 2.01650  | 0.77243  | H       | 1.66375 | 5.11186  | -1.93074 |         |
| H       | -1.09041 | 4.21864  | 1.57049  | C       | 2.16767 | 3.24085  | -3.20251 |         |
| H       | -0.31447 | 3.92233  | -1.36166 | O       | 2.00467 | 4.49402  | -3.41538 |         |
| O       | 2.46783  | 2.32189  | 1.59895  | O       | 2.63758 | 2.39541  | -3.97815 |         |
| C       | 2.81692  | 1.14573  | 2.12649  | C       | 2.84857 | -1.21976 | 1.99059  |         |
| O       | 1.41575  | 5.06550  | 2.05464  | H       | 3.63493 | -0.47711 | 1.82043  |         |
| O       | -0.50506 | 5.92678  | 0.55646  | C       | 2.75622 | -1.45914 | 3.49287  |         |
| H       | 0.24206  | 6.11548  | 1.20462  | C       | 2.66126 | -1.80929 | 6.30404  |         |
| O       | -2.31539 | 3.91821  | -0.76148 | C       | 2.88345 | -2.72857 | 4.07446  |         |
| H       | -2.53423 | 3.11672  | -1.30636 | C       | 2.56827 | -0.36234 | 4.35645  |         |
| C       | -1.18081 | 1.18127  | -1.20181 | C       | 2.52347 | -0.53676 | 5.73774  |         |
| O       | -0.57060 | 0.09454  | -1.29903 | C       | 2.83730 | -2.90552 | 5.46210  |         |
| O       | -2.19625 | 1.54518  | -1.87487 | H       | 3.02231 | -3.59966 | 3.44147  |         |
| C       | 1.75729  | 0.03829  | 2.32541  | H       | 2.43018 | 0.61128  | 3.89033  |         |
| H       | 0.80921  | 0.36455  | 1.90240  | H       | 2.37471 | 0.32876  | 6.38174  |         |
| C       | 2.17523  | -1.21095 | 1.55469  | H       | 2.93995 | -3.90610 | 5.88075  |         |
| C       | 2.88560  | -3.51429 | 0.10161  | H       | 2.62611 | -1.94200 | 7.38444  |         |
| C       | 3.15268  | -2.09206 | 2.04139  | O       | 0.43624 | -1.05473 | 1.73401  |         |
| C       | 1.57179  | -1.48043 | 0.31593  | C       | 3.19943 | -2.48003 | 1.18199  |         |
| C       | 1.92799  | -2.62868 | -0.39726 | H       | 4.13874 | -2.93881 | 1.51951  |         |
| C       | 3.50264  | -3.23763 | 1.32421  | H       | 3.29965 | -2.20632 | 0.12998  |         |
| H       | 3.65558  | -1.87065 | 2.97747  | H       | 2.40058 | -3.22706 | 1.26083  |         |
| H       | 0.83402  | -0.79096 | -0.10884 |         |         |          |          |         |
| H       | 1.44588  | -2.81956 | -1.35324 |         |         |          |          |         |
| H       | 4.26195  | -3.91128 | 1.71908  | 39      |         |          |          |         |
| H       | 3.15581  | -4.40866 | -0.45826 | ts2.out |         |          |          |         |
| O       | 3.97547  | 0.94942  | 2.45625  | C       | 2.76098 | 4.44258  | -0.73026 |         |
| C       | 1.58628  | -0.20241 | 3.83823  | C       | 1.96074 | 2.79259  | 0.94274  |         |
| H       | 0.90731  | -1.04319 | 4.01976  | O       | 2.92193 | 1.95022  | -1.11034 |         |
| H       | 1.16816  | 0.68847  | 4.31987  | C       | 1.86629 | 1.79172  | -0.19942 |         |
| H       | 2.54780  | -0.41671 | 4.31403  | C       | 2.80773 | 3.23812  | -1.74226 |         |
|         |          |          |          | C       | 1.71646 | 4.18471  | 0.36071  |         |
|         |          |          |          | H       | 3.03459 | 2.76832  | 1.24990  |         |
| 39      |          |          |          | H       | 0.89393 | 1.87058  | -0.72097 |         |

|         |          |          |          |         |          |          |          |
|---------|----------|----------|----------|---------|----------|----------|----------|
| H       | 1.84491  | 3.27963  | -2.28758 | C       | 0.79998  | -2.10882 | 6.17620  |
| H       | 0.71837  | 4.21324  | -0.11213 | C       | 1.23413  | -0.68554 | 4.25238  |
| H       | 3.74831  | 4.51177  | -0.23591 | C       | -0.19951 | -2.60727 | 4.03302  |
| O       | 1.93397  | 0.52934  | 0.45181  | C       | -0.01331 | -2.91847 | 5.38331  |
| C       | 0.89701  | 0.46426  | 1.43602  | C       | 1.42093  | -0.99540 | 5.59966  |
| O       | 1.10932  | 2.41363  | 1.95262  | H       | 1.71590  | 0.17063  | 3.78566  |
| O       | 1.76175  | 5.14616  | 1.42582  | H       | -0.83141 | -3.24733 | 3.41844  |
| H       | 1.38756  | 4.61922  | 2.15533  | H       | -0.49941 | -3.79461 | 5.81084  |
| O       | 2.46700  | 5.62884  | -1.44485 | H       | 2.06407  | -0.36184 | 6.20852  |
| H       | 3.01942  | 5.49630  | -2.27162 | H       | 0.95401  | -2.34435 | 7.22825  |
| C       | 3.93575  | 3.43251  | -2.81703 | O       | 1.48701  | 1.16205  | 1.97148  |
| O       | 3.96535  | 4.61813  | -3.30179 | O       | 2.54173  | 3.85935  | 1.76934  |
| O       | 4.65265  | 2.46909  | -3.12679 | H       | 2.45834  | 3.19517  | 2.47442  |
| C       | 1.43074  | -0.16004 | 2.74895  | O       | 1.89872  | 5.10022  | -0.85720 |
| H       | 0.69222  | 0.13800  | 3.50134  | H       | 1.94076  | 5.17159  | -1.85831 |
| C       | 1.42537  | -1.68243 | 2.67659  | C       | 1.93696  | 3.30032  | -3.22799 |
| C       | 1.50761  | -4.51127 | 2.61655  | O       | 2.03021  | 4.56925  | -3.38212 |
| C       | 1.97287  | -2.36785 | 1.57743  | O       | 2.12559  | 2.41881  | -4.07891 |
| C       | 0.91676  | -2.44933 | 3.73510  | C       | -1.08769 | -0.21533 | 1.86949  |
| C       | 0.95564  | -3.84592 | 3.71196  | H       | -0.83843 | 0.75928  | 2.29283  |
| C       | 2.01209  | -3.76177 | 1.54916  | H       | -1.96040 | -0.63917 | 2.38569  |
| H       | 2.34604  | -1.78575 | 0.73964  | H       | -1.34028 | -0.07340 | 0.81477  |
| H       | 0.47993  | -1.93724 | 4.59056  |         |          |          |          |
| H       | 0.54988  | -4.41325 | 4.54852  | 39      |          |          |          |
| H       | 2.43585  | -4.26759 | 0.68362  | ts4.out |          |          |          |
| H       | 1.53843  | -5.59907 | 2.59021  | C       | 2.52453  | 3.92248  | -0.52942 |
| O       | -0.27102 | 0.28544  | 1.10512  | C       | 2.07720  | 1.87606  | 0.82753  |
| C       | 2.80870  | 0.36073  | 3.18729  | O       | 1.33436  | 1.91983  | -1.47176 |
| H       | 3.56702  | 0.12417  | 2.43610  | C       | 0.96555  | 1.55500  | -0.15980 |
| H       | 3.11238  | -0.08351 | 4.14593  | C       | 1.47561  | 3.34755  | -1.54678 |
| H       | 2.73328  | 1.44631  | 3.27639  | C       | 2.22650  | 3.39877  | 0.87795  |
|         |          |          |          | H       | 3.00721  | 1.48671  | 0.35521  |
| 39      |          |          |          | H       | 0.03088  | 2.08486  | 0.11037  |
| ts3.out |          |          |          | H       | 0.51084  | 3.81650  | -1.26846 |
| C       | 2.19867  | 3.72958  | -0.67450 | H       | 1.26984  | 3.84931  | 1.20364  |
| C       | 1.89827  | 1.74623  | 0.78989  | H       | 3.52387  | 3.54918  | -0.82192 |
| O       | 1.58884  | 1.47057  | -1.59091 | O       | 0.69547  | 0.16051  | -0.07256 |
| C       | 1.06686  | 1.13704  | -0.32247 | C       | 1.30362  | -0.54478 | 0.98035  |
| C       | 1.47292  | 2.88834  | -1.78492 | O       | 2.33690  | -1.16932 | 0.79533  |
| C       | 1.76395  | 3.26302  | 0.72002  | C       | 0.31608  | -1.04383 | 2.08212  |
| H       | 2.95464  | 1.50100  | 0.54949  | H       | 0.85688  | -0.81782 | 3.00702  |
| H       | 0.02089  | 1.50876  | -0.26557 | C       | -1.02961 | -0.33637 | 2.16737  |
| H       | 0.40389  | 3.17257  | -1.71395 | C       | -3.50154 | 1.01140  | 2.46299  |
| H       | 0.70271  | 3.54223  | 0.85167  | C       | -2.24643 | -0.98356 | 1.90759  |
| H       | 3.28560  | 3.54343  | -0.76221 | C       | -1.07556 | 1.01065  | 2.57654  |
| O       | 1.07711  | -0.25538 | -0.10567 | C       | -2.29493 | 1.67107  | 2.71941  |
| C       | 1.40780  | -0.65605 | 1.25023  | C       | -3.46951 | -0.32005 | 2.05117  |
| O       | 2.46744  | -1.24436 | 1.43590  | H       | -2.25087 | -2.02187 | 1.58902  |
| C       | 0.13162  | -1.14491 | 1.98931  | H       | -0.11456 | 1.51108  | 2.71604  |
| H       | -0.12005 | -2.08947 | 1.48032  | H       | -2.30308 | 2.71517  | 3.02731  |
| C       | 0.41143  | -1.49097 | 3.44464  | H       | -4.39729 | -0.84971 | 1.83841  |

|   |          |          |          |   |          |         |         |
|---|----------|----------|----------|---|----------|---------|---------|
| H | -4.45171 | 1.53119  | 2.57544  | C | -1.06892 | 0.95002 | 2.22994 |
| O | 1.82460  | 1.27633  | 2.03590  | H | -0.71920 | 0.15626 | 2.89728 |
| O | 3.24540  | 3.71451  | 1.83576  | H | -2.16616 | 0.92166 | 2.18805 |
| H | 3.13350  | 2.97271  | 2.46020  | H | -0.72935 | 1.91248 | 2.61713 |
| O | 2.47818  | 5.33736  | -0.56287 |   |          |         |         |
| H | 2.36833  | 5.50090  | -1.54695 |   |          |         |         |
| C | 1.77639  | 3.80577  | -3.01888 |   |          |         |         |
| O | 2.08586  | 5.04656  | -3.10400 |   |          |         |         |
| O | 1.65927  | 2.99000  | -3.94526 |   |          |         |         |
| C | 0.21157  | -2.57579 | 1.97077  |   |          |         |         |
| H | -0.27501 | -2.88443 | 1.03740  |   |          |         |         |
| H | -0.35330 | -3.00753 | 2.80746  |   |          |         |         |
| H | 1.22263  | -2.98762 | 1.96277  |   |          |         |         |

39

ts5.out

|   |          |          |          |
|---|----------|----------|----------|
| C | 2.62347  | 5.04611  | -0.98099 |
| C | 1.90596  | 3.22159  | 0.56236  |
| O | 2.63679  | 2.62429  | -1.67311 |
| C | 1.67765  | 2.37130  | -0.67895 |
| C | 2.50541  | 3.98161  | -2.13065 |
| C | 1.67755  | 4.68336  | 0.16601  |
| H | 2.99603  | 3.12186  | 0.78287  |
| H | 0.66516  | 2.56002  | -1.09567 |
| H | 1.48912  | 4.11731  | -2.55052 |
| H | 0.64189  | 4.79615  | -0.20647 |
| H | 3.65722  | 5.01232  | -0.58886 |
| O | 1.77416  | 1.02463  | -0.24519 |
| C | 1.09306  | 0.74936  | 0.95154  |
| O | 1.62785  | -0.00873 | 1.75814  |
| C | -0.45253 | 0.77386  | 0.83215  |
| H | -0.74570 | 1.63322  | 0.22610  |
| C | -0.97612 | -0.48963 | 0.15902  |
| C | -2.04913 | -2.82052 | -1.03566 |
| C | -0.55602 | -1.76983 | 0.56228  |
| C | -1.93558 | -0.40933 | -0.86131 |
| C | -2.46964 | -1.55687 | -1.45283 |
| C | -1.08446 | -2.91746 | -0.02797 |
| H | 0.21531  | -1.83119 | 1.32398  |
| H | -2.26345 | 0.57194  | -1.19789 |
| H | -3.21014 | -1.46157 | -2.24526 |
| H | -0.73656 | -3.89708 | 0.29620  |
| H | -2.45956 | -3.71777 | -1.49545 |
| O | 1.11053  | 2.76975  | 1.57884  |
| O | 1.84975  | 5.50125  | 1.33104  |
| H | 1.53409  | 4.88960  | 2.02234  |
| O | 2.31808  | 6.32591  | -1.50406 |
| H | 2.76984  | 6.28008  | -2.39889 |
| C | 3.50842  | 4.27472  | -3.30325 |
| O | 3.54258  | 5.51220  | -3.63389 |
| O | 4.12938  | 3.33461  | -3.82036 |

|             |          |          |          |         |          |          |          |
|-------------|----------|----------|----------|---------|----------|----------|----------|
| Molecule 13 |          |          |          | C       | 3.46921  | 0.08916  | -0.40954 |
| 39          |          |          |          | O       | 1.71168  | 1.83878  | -0.81494 |
| gs1.out     |          |          |          | H       | 0.55759  | 0.83266  | 0.55731  |
| C           | 3.09990  | -2.14390 | 0.69280  | H       | 2.09844  | -1.03060 | 0.79668  |
| C           | 3.35070  | 0.27230  | 1.23430  | H       | 3.80356  | 0.08748  | -1.46405 |
| O           | 2.34530  | -0.42280 | -0.93010 | H       | 2.66526  | 1.49808  | 0.99887  |
| C           | 2.38980  | 0.55800  | 0.04850  | O       | 4.54185  | -0.20033 | 0.46730  |
| C           | 2.15160  | -1.79480 | -0.47950 | H       | 5.00287  | 0.69112  | 0.50457  |
| C           | 3.01750  | -1.12330 | 1.85690  | O       | 2.74706  | -2.25631 | -0.75273 |
| H           | 3.09980  | 1.04680  | 2.00870  | H       | 1.88202  | -2.62261 | -1.01079 |
| H           | 2.67360  | 1.48250  | -0.46040 | C       | 3.99642  | 2.63215  | -0.26816 |
| H           | 2.49150  | -2.38050 | -1.33990 | O       | 5.13477  | 2.30365  | 0.22106  |
| H           | 3.86840  | -1.34130 | 2.52020  | O       | 3.68577  | 3.70460  | -0.80698 |
| H           | 2.80550  | -3.14370 | 1.05830  | O       | -0.50785 | 1.19439  | -1.15762 |
| O           | 1.01100  | 0.74170  | 0.59900  | C       | -1.17332 | 0.12547  | -1.82064 |
| C           | 0.03030  | 1.21470  | -0.16860 | H       | 1.48470  | -0.31380 | -2.10757 |
| O           | 4.63760  | 0.30200  | 0.77770  | O       | 0.05273  | -1.33933 | -1.02804 |
| O           | 1.83120  | -1.21330 | 2.63150  | C       | -2.49011 | -0.29715 | -1.10910 |
| H           | 1.11950  | -1.53780 | 2.02030  | O       | -1.13105 | 0.05195  | -3.04220 |
| O           | 4.44130  | -2.18140 | 0.22920  | C       | -2.86115 | -1.71990 | -1.56429 |
| H           | 4.71260  | -1.18270 | 0.32660  | H       | -2.11766 | -2.42643 | -1.18904 |
| C           | 0.61450  | -2.07910 | -0.33240 | H       | -2.83753 | -1.75462 | -2.65692 |
| O           | -0.02250 | -2.13760 | -1.41350 | H       | -3.85923 | -2.00844 | -1.20775 |
| O           | 0.12040  | -2.20200 | 0.83520  | C       | -2.58774 | -0.14316 | 0.39795  |
| C           | -1.31970 | 0.74350  | 0.41880  | C       | -2.92386 | 0.05421  | 3.19976  |
| H           | -1.15850 | -0.31880 | 0.64930  | C       | -1.71921 | -0.81612 | 1.27642  |
| C           | -2.44610 | 0.83970  | -0.59310 | C       | -3.61907 | 0.62695  | 0.95619  |
| C           | -4.52430 | 0.90170  | -2.50050 | C       | -3.79060 | 0.72896  | 2.33926  |
| C           | -3.37510 | 1.88780  | -0.61320 | C       | -1.88743 | -0.71233 | 2.65762  |
| C           | -2.56940 | -0.18510 | -1.55040 | H       | -0.89618 | -1.36991 | 0.82390  |
| C           | -3.59890 | -0.14760 | -2.49090 | H       | -4.29930 | 1.15875  | 0.29235  |
| C           | -4.40670 | 1.92200  | -1.55660 | H       | -4.59820 | 1.33892  | 2.74188  |
| H           | -3.29790 | 2.68960  | 0.11670  | H       | -1.19496 | -1.22996 | 3.31913  |
| H           | -1.84000 | -1.00210 | -1.54250 | H       | -3.04733 | 0.13237  | 4.27879  |
| H           | -3.67950 | -0.94830 | -3.22390 | H       | -3.23668 | 0.38899  | -1.54135 |
| H           | -5.11730 | 2.74770  | -1.55170 | 39      |          |          |          |
| H           | -5.32720 | 0.92360  | -3.23620 | ts2.out |          |          |          |
| O           | 0.15440  | 1.92770  | -1.14800 | C       | 0.83620  | -2.69582 | 2.48268  |
| C           | -1.56280 | 1.46840  | 1.75580  | C       | 0.31294  | -0.74521 | 1.32814  |
| H           | -1.59400 | 2.55950  | 1.63840  | C       | -1.59500 | -2.07959 | 2.12432  |
| H           | -0.74610 | 1.22280  | 2.43890  | C       | -1.09144 | -1.21520 | 0.95719  |
| H           | -2.50980 | 1.14870  | 2.20770  | C       | -0.62997 | -3.24402 | 2.34916  |
| 39          |          |          |          | O       | 1.21968  | -1.80898 | 1.41577  |
| ts1.out     |          |          |          | H       | 0.30386  | -0.15612 | 2.26325  |
| C           | 2.90450  | 1.51828  | -0.08301 | H       | -1.59941 | -1.46698 | 3.04545  |
| C           | 0.72391  | 0.86853  | -0.53850 | H       | -0.67170 | -3.89792 | 1.45774  |
| C           | 2.35987  | -0.95966 | -0.27560 | H       | 0.85221  | -2.13140 | 3.43524  |
| C           | 1.13923  | -0.49321 | -1.06605 | O       | -0.95964 | -3.96507 | 3.52351  |
|             |          |          |          | H       | -0.09843 | -4.44477 | 3.70404  |
|             |          |          |          | O       | -2.93583 | -2.47909 | 1.81792  |



|         |          |          |          |         |          |          |          |
|---------|----------|----------|----------|---------|----------|----------|----------|
| H       | -3.22010 | -1.69312 | 1.30751  | O       | 1.81226  | 0.51368  | -1.35983 |
| C       | 1.88094  | -3.85830 | 2.63613  | C       | -1.71113 | 1.51708  | -0.58706 |
| O       | 1.51079  | -4.75542 | 3.47226  | C       | -4.14612 | 1.81245  | 0.83177  |
| O       | 2.94385  | -3.80888 | 1.99869  | C       | -2.90522 | 0.95619  | -1.06359 |
| O       | 0.70737  | 0.11758  | 0.24935  | C       | -1.76472 | 2.22629  | 0.62755  |
| C       | -0.13266 | 1.20744  | 0.13575  | C       | -2.96215 | 2.37129  | 1.32437  |
| H       | -0.92554 | -1.92288 | 0.10278  | C       | -4.10813 | 1.09840  | -0.36468 |
| O       | -1.90640 | -0.16795 | 0.65233  | H       | -2.90465 | 0.39698  | -1.99428 |
| C       | -0.60446 | 1.40535  | -1.31670 | H       | -0.82148 | 2.60916  | 1.01106  |
| O       | -0.16914 | 2.11642  | 0.95811  | H       | -2.97050 | 2.91631  | 2.26652  |
| C       | 0.39501  | 2.22610  | -2.12155 | H       | -5.01653 | 0.64579  | -0.76011 |
| C       | 2.16849  | 3.78910  | -3.67580 | H       | -5.08021 | 1.92251  | 1.38006  |
| C       | 0.89962  | 3.44604  | -1.63725 | H       | 0.01623  | 2.45787  | -1.37010 |
| C       | 0.80994  | 1.80590  | -3.39359 | C       | -0.55392 | 0.98562  | -2.81295 |
| C       | 1.68353  | 2.57544  | -4.16562 | H       | 0.43124  | 1.02012  | -3.28228 |
| C       | 1.77440  | 4.21540  | -2.40377 | H       | -1.25377 | 1.62032  | -3.37364 |
| H       | 0.61168  | 3.75494  | -0.63679 | H       | -0.90910 | -0.05011 | -2.87290 |
| H       | 0.44276  | 0.85691  | -3.77817 |         |          |          |          |
| H       | 1.99030  | 2.22177  | -5.14848 | 39      |          |          |          |
| H       | 2.15750  | 5.15263  | -2.00348 | ts4.out |          |          |          |
| H       | 2.85180  | 4.39068  | -4.27228 | C       | 2.09966  | 1.62773  | -0.20063 |
| C       | -1.99560 | 2.06222  | -1.32036 | C       | 0.58993  | 0.53595  | -1.57399 |
| H       | -1.96471 | 3.01600  | -0.78388 | C       | 1.46046  | -0.78992 | 0.31958  |
| H       | -2.66805 | 1.38053  | -0.79505 | C       | 1.04616  | -0.84544 | -1.14614 |
| H       | -2.34433 | 2.24477  | -2.34585 | C       | 2.54601  | 0.28237  | 0.47700  |
| H       | -0.68365 | 0.41255  | -1.76491 | O       | 1.64709  | 1.46432  | -1.55446 |
|         |          |          |          | H       | -0.21445 | 0.89850  | -0.89416 |
| 39      |          |          |          | H       | 0.59263  | -0.48431 | 0.93195  |
| ts3.out |          |          |          | H       | 3.44777  | -0.08083 | -0.05109 |
| C       | 1.52343  | -1.77523 | 3.12867  | H       | 1.25607  | 1.99904  | 0.41435  |
| C       | 1.07781  | -0.66919 | 1.15362  | O       | 2.81600  | 0.51922  | 1.84533  |
| C       | 2.01434  | 0.72858  | 2.95321  | H       | 3.27970  | 1.40895  | 1.79782  |
| C       | 0.98983  | 0.69438  | 1.82447  | O       | 1.90615  | -2.08679 | 0.74575  |
| C       | 1.69435  | -0.42285 | 3.91484  | H       | 1.33546  | -2.67445 | 0.22288  |
| O       | 0.62526  | -1.68671 | 2.00819  | C       | 3.22246  | 2.72228  | -0.11187 |
| H       | 2.11296  | -0.88447 | 0.82710  | O       | 3.77453  | 2.78075  | 1.04297  |
| H       | 3.02397  | 0.55781  | 2.54009  | O       | 3.45119  | 3.43724  | -1.09831 |
| H       | 0.72884  | -0.18739 | 4.40091  | O       | 0.08583  | 0.35815  | -2.87396 |
| H       | 2.53539  | -2.02054 | 2.75165  | C       | -0.68629 | -0.86873 | -3.00756 |
| O       | 2.72300  | -0.57594 | 4.87431  | H       | 1.96644  | -1.05481 | -1.73401 |
| H       | 2.53253  | -1.50286 | 5.21076  | O       | 0.02182  | -1.71987 | -1.45207 |
| O       | 1.98075  | 2.01216  | 3.59946  | C       | -2.14257 | -0.62867 | -2.47636 |
| H       | 1.81002  | 2.59965  | 2.84396  | O       | -0.52758 | -1.51585 | -4.03795 |
| C       | 1.11247  | -2.95045 | 4.08603  | H       | -2.06458 | -0.22089 | -1.46393 |
| O       | 1.78346  | -2.96452 | 5.17798  | C       | -2.94104 | -1.92072 | -2.37960 |
| O       | 0.24586  | -3.75761 | 3.71970  | C       | -4.43620 | -4.31149 | -2.08848 |
| O       | 0.25803  | -0.51843 | 0.00799  | C       | -4.00262 | -2.22698 | -3.24340 |
| C       | 0.76453  | 0.61215  | -0.71250 | C       | -2.63552 | -2.85195 | -1.36864 |
| H       | -0.01512 | 0.71989  | 2.30156  | C       | -3.37235 | -4.02574 | -1.22568 |
| O       | 1.12403  | 1.66146  | 0.84324  | C       | -4.74270 | -3.40579 | -3.10273 |
| C       | -0.39945 | 1.44334  | -1.35242 | H       | -4.26212 | -1.53695 | -4.04001 |

|   |          |          |          |
|---|----------|----------|----------|
| H | -1.77453 | -2.63613 | -0.74222 |
| H | -3.11139 | -4.72839 | -0.43577 |
| H | -5.56142 | -3.61248 | -3.79112 |
| H | -5.01146 | -5.22912 | -1.97426 |
| C | -2.79445 | 0.43189  | -3.37931 |
| H | -2.20955 | 1.35295  | -3.32656 |
| H | -3.83016 | 0.64920  | -3.08455 |
| H | -2.78912 | 0.09917  | -4.42337 |

|             |          |          |          |         |          |          |          |
|-------------|----------|----------|----------|---------|----------|----------|----------|
| Molecule 15 |          |          |          | C       | 0.32038  | -2.10549 | 3.01564  |
|             |          |          |          | C       | -0.82044 | -1.69871 | 2.00290  |
| 42          |          |          |          | C       | 1.69863  | -1.91945 | 2.40303  |
| gs1.out     |          |          |          | O       | 0.71739  | 0.07855  | 1.26696  |
| C           | 1.83133  | -0.40046 | 2.01212  | H       | -0.87243 | 0.41481  | 2.58924  |
| C           | -0.59296 | -0.20154 | 1.72920  | H       | 0.26202  | -1.42153 | 3.89078  |
| C           | 0.32397  | -2.08670 | 3.02840  | H       | 1.76670  | -2.53814 | 1.48966  |
| C           | -0.81657 | -1.69025 | 2.01123  | H       | 1.92001  | 0.13458  | 2.95907  |
| C           | 1.70264  | -1.89873 | 2.41732  | O       | 2.75522  | -2.23881 | 3.30198  |
| O           | 0.71563  | 0.08844  | 1.26735  | H       | 3.51931  | -1.75616 | 2.89235  |
| H           | -0.87745 | 0.42649  | 2.58522  | O       | -0.02688 | -3.41789 | 3.40997  |
| H           | 0.26121  | -1.39797 | 3.89947  | H       | -1.01890 | -3.30868 | 3.24457  |
| H           | 1.77497  | -2.52259 | 1.50778  | C       | 3.13490  | -0.15148 | 1.18458  |
| H           | 1.91477  | 0.15953  | 2.96135  | O       | 4.18527  | -0.60765 | 1.74166  |
| O           | 2.75874  | -2.20850 | 3.32021  | O       | 3.05487  | 0.46211  | 0.09749  |
| H           | 3.52172  | -1.72535 | 2.90911  | O       | -1.37612 | 0.23265  | 0.57405  |
| O           | -0.01886 | -3.39819 | 3.42959  | C       | -1.40193 | 1.55127  | 0.35922  |
| H           | -1.01098 | -3.29383 | 3.26173  | O       | -1.62853 | 2.39561  | 1.20872  |
| C           | 3.13420  | -0.13240 | 1.19094  | C       | -1.05770 | 1.97973  | -1.09816 |
| O           | 3.05381  | 0.47450  | 0.10013  | C       | 0.34565  | 2.65131  | -0.97569 |
| O           | 4.18529  | -0.58118 | 1.75265  | H       | 1.09912  | 1.97082  | -0.56432 |
| O           | -1.37736 | 0.23064  | 0.57037  | H       | 0.27052  | 3.51826  | -0.31187 |
| C           | -1.40810 | 1.54786  | 0.34793  | H       | 0.67511  | 2.98959  | -1.96604 |
| O           | -1.63905 | 2.39623  | 1.19224  | H       | -0.53677 | -2.18851 | 1.02437  |
| C           | -1.06373 | 1.96917  | -1.11148 | O       | -2.00912 | -2.07315 | 2.50443  |
| C           | 0.33686  | 2.64687  | -0.99120 | C       | -0.97057 | 0.81100  | -2.08857 |
| H           | 1.09226  | 1.97189  | -0.57435 | C       | -0.72130 | -1.30416 | -3.95132 |
| H           | 0.25741  | 3.51774  | -0.33303 | C       | -1.86080 | 0.67803  | -3.16343 |
| H           | 0.66654  | 2.98008  | -1.98318 | C       | 0.05722  | -0.14561 | -1.96291 |
| H           | -0.52914 | -2.18458 | 1.03607  | C       | 0.17359  | -1.18481 | -2.88393 |
| O           | -2.00471 | -2.06643 | 2.51272  | C       | -1.74202 | -0.36649 | -4.08654 |
| C           | -0.97086 | 0.79501  | -2.09495 | H       | -2.66513 | 1.39478  | -3.29696 |
| C           | -0.71167 | -1.32971 | -3.94538 | H       | 0.76585  | -0.08743 | -1.13983 |
| C           | -1.85933 | 0.65267  | -3.17006 | H       | 0.97220  | -1.91095 | -2.75598 |
| C           | 0.06030  | -0.15707 | -1.96264 | H       | -2.45259 | -0.44063 | -4.90853 |
| C           | 0.18153  | -1.20103 | -2.87765 | H       | -0.62431 | -2.12085 | -4.66447 |
| C           | -1.73567 | -0.39660 | -4.08709 | C       | -2.07749 | 3.05744  | -1.51604 |
| H           | -2.66611 | 1.36572  | -3.30849 | H       | -2.08486 | 3.84324  | -0.75800 |
| H           | 0.76767  | -0.09166 | -1.13902 | H       | -3.09575 | 2.65791  | -1.58608 |
| H           | 0.98263  | -1.92351 | -2.74468 | H       | -1.81217 | 3.49629  | -2.48515 |
| H           | -2.44500 | -0.47802 | -4.90946 |         |          |          |          |
| H           | -0.61084 | -2.15010 | -4.65375 | 42      |          |          |          |
| C           | -2.08715 | 3.04048  | -1.53685 | gs3.out |          |          |          |
| H           | -2.09853 | 3.83067  | -0.78344 | C       | 1.45624  | -1.81228 | 1.77944  |
| H           | -3.10379 | 2.63663  | -1.60575 | C       | -0.54379 | -0.40884 | 2.08993  |
| H           | -1.82239 | 3.47474  | -2.50818 | C       | -0.86700 | -2.92809 | 1.88720  |
|             |          |          |          | C       | -1.38458 | -1.62434 | 2.56684  |
| 42          |          |          |          | C       | 0.63581  | -3.03719 | 2.25337  |
| gs2.out     |          |          |          | O       | 0.82687  | -0.54097 | 2.14007  |
| C           | 1.83252  | -0.41930 | 2.00662  | H       | -0.80387 | 0.46855  | 2.68249  |
| C           | -0.59159 | -0.20925 | 1.72913  | H       | -1.37394 | -3.74774 | 2.41937  |

|         |          |          |          |         |          |          |          |
|---------|----------|----------|----------|---------|----------|----------|----------|
| H       | 1.07165  | -3.92025 | 1.75212  | C       | 3.11075  | -0.55689 | 0.93330  |
| H       | 2.37270  | -1.80337 | 2.37599  | O       | 4.14150  | 0.11375  | 1.14481  |
| O       | 0.74575  | -3.18954 | 3.65832  | O       | 2.64493  | -0.88755 | -0.21355 |
| H       | -0.03250 | -2.57658 | 3.98673  | O       | -0.04353 | 0.37173  | 0.75082  |
| O       | -1.14577 | -3.06396 | 0.50361  | C       | -0.79790 | 1.41067  | 0.46827  |
| H       | -0.34865 | -2.71488 | 0.01497  | O       | -1.55508 | 2.00117  | 1.22873  |
| C       | 1.90303  | -1.77010 | 0.27943  | C       | -0.62288 | 1.83953  | -1.02372 |
| O       | 1.06539  | -2.16659 | -0.60305 | C       | 0.87313  | 1.75737  | -1.42307 |
| O       | 3.04743  | -1.31856 | 0.05138  | H       | 1.30961  | 0.77369  | -1.23157 |
| O       | -0.91560 | -0.05462 | 0.65435  | H       | 1.45539  | 2.47839  | -0.83694 |
| C       | -1.38784 | 1.13295  | 0.34053  | H       | 0.98511  | 2.01185  | -2.48543 |
| O       | -1.66223 | 2.04548  | 1.10967  | H       | -1.47123 | -1.62268 | 1.48176  |
| C       | -1.56749 | 1.28078  | -1.20672 | O       | -0.77466 | -2.07667 | 3.41038  |
| C       | -2.65291 | 2.34207  | -1.45062 | C       | -1.44378 | 0.88253  | -1.91486 |
| H       | -2.40713 | 3.28288  | -0.95332 | C       | -2.88002 | -0.89508 | -3.58822 |
| H       | -3.60574 | 1.99606  | -1.03675 | C       | -2.39586 | 1.35312  | -2.83324 |
| H       | -2.79220 | 2.52145  | -2.52387 | C       | -1.22968 | -0.50828 | -1.84601 |
| H       | -2.41910 | -1.43483 | 2.17570  | C       | -1.94229 | -1.37765 | -2.67171 |
| O       | -1.28718 | -1.70786 | 3.92763  | C       | -3.10461 | 0.47874  | -3.66317 |
| C       | -0.19679 | 1.69205  | -1.78423 | H       | -2.59713 | 2.41665  | -2.91104 |
| C       | 2.36584  | 2.39289  | -2.74815 | H       | -0.52785 | -0.93677 | -1.13181 |
| C       | 0.87997  | 0.79278  | -1.70177 | H       | -1.75357 | -2.44435 | -2.58001 |
| C       | 0.03672  | 2.94713  | -2.36808 | H       | -3.83521 | 0.87875  | -4.36521 |
| C       | 1.30199  | 3.29069  | -2.85497 | H       | -3.43313 | -1.58000 | -4.22903 |
| C       | 2.14881  | 1.14284  | -2.16327 | C       | -1.09570 | 3.29915  | -1.13874 |
| H       | 0.75236  | -0.19606 | -1.26789 | H       | -0.50442 | 3.92544  | -0.46446 |
| H       | -0.76648 | 3.67378  | -2.44403 | H       | -2.14366 | 3.40860  | -0.84835 |
| H       | 1.45448  | 4.27073  | -3.30628 | H       | -0.95902 | 3.67801  | -2.15880 |
| H       | 2.94765  | 0.42129  | -2.01257 |         |          |          |          |
| H       | 3.35516  | 2.67101  | -3.10893 | 42      |          |          |          |
| C       | -2.02263 | -0.06423 | -1.82095 | gs5.out |          |          |          |
| H       | -3.00604 | -0.34471 | -1.42598 | C       | 2.26171  | -1.13207 | 2.28287  |
| H       | -1.33674 | -0.87425 | -1.57379 | C       | -0.01788 | -0.22325 | 2.14082  |
| H       | -2.10123 | 0.03014  | -2.91183 | C       | 0.35172  | -2.64320 | 1.44617  |
|         |          |          |          | C       | -0.64147 | -1.64636 | 2.11662  |
| 42      |          |          |          | C       | 1.66441  | -2.56073 | 2.26637  |
| gs4.out |          |          |          | O       | 1.26479  | -0.11649 | 2.62914  |
| C       | 2.33166  | -1.04697 | 2.20516  | H       | -0.64817 | 0.44127  | 2.73283  |
| C       | 0.01335  | -0.23088 | 2.14680  | H       | -0.07154 | -3.64251 | 1.62981  |
| C       | 0.45834  | -2.62490 | 1.40900  | H       | 2.42680  | -3.21392 | 1.80515  |
| C       | -0.55240 | -1.67788 | 2.12351  | H       | 2.94673  | -1.09150 | 3.13400  |
| C       | 1.79276  | -2.49833 | 2.18742  | O       | 1.39939  | -3.00773 | 3.58473  |
| O       | 1.30578  | -0.07684 | 2.59448  | H       | 0.43754  | -2.63308 | 3.73250  |
| H       | -0.62398 | 0.39982  | 2.76758  | O       | 0.53787  | -2.49308 | 0.04444  |
| H       | 0.08340  | -3.64302 | 1.59428  | H       | 1.35747  | -1.91640 | -0.08247 |
| H       | 2.56521  | -3.11413 | 1.69291  | C       | 3.10001  | -0.69144 | 1.03060  |
| H       | 3.03987  | -0.98883 | 3.03606  | O       | 2.65611  | -1.01521 | -0.12683 |
| O       | 1.58906  | -2.97240 | 3.50746  | O       | 4.15284  | -0.06495 | 1.26726  |
| H       | 0.61847  | -2.64062 | 3.69123  | O       | -0.00589 | 0.36263  | 0.73692  |
| O       | 0.59268  | -2.45254 | 0.00389  | C       | -0.70746 | 1.42767  | 0.41774  |
| H       | 1.38462  | -1.84298 | -0.14137 | O       | -1.45919 | 2.06194  | 1.14776  |

|         |          |          |          |         |          |          |          |
|---------|----------|----------|----------|---------|----------|----------|----------|
| C       | -0.47261 | 1.82494  | -1.07483 | O       | 0.79744  | -0.71170 | -1.54223 |
| C       | 1.02901  | 1.67142  | -1.42935 | C       | -2.32903 | 1.77937  | -0.57016 |
| H       | 1.41654  | 0.67349  | -1.20839 | C       | -4.60721 | 2.94450  | 0.66666  |
| H       | 1.62531  | 2.37664  | -0.83811 | C       | -2.49680 | 1.75823  | 0.82905  |
| H       | 1.18247  | 1.90171  | -2.49196 | C       | -3.34165 | 2.39261  | -1.32404 |
| H       | -1.53680 | -1.56252 | 1.44566  | C       | -4.46381 | 2.96858  | -0.71926 |
| O       | -0.91932 | -2.01804 | 3.40098  | C       | -3.61451 | 2.32869  | 1.43519  |
| C       | -1.31032 | 0.89124  | -1.97443 | H       | -1.74742 | 1.25541  | 1.43154  |
| C       | -2.78018 | -0.84713 | -3.65986 | H       | -3.26075 | 2.42024  | -2.40551 |
| C       | -2.21899 | 1.38877  | -2.92208 | H       | -5.22848 | 3.43429  | -1.33996 |
| C       | -1.15778 | -0.50624 | -1.88184 | H       | -3.71320 | 2.28588  | 2.51828  |
| C       | -1.88659 | -1.35602 | -2.71402 | H       | -5.47993 | 3.38959  | 1.14156  |
| C       | -2.94364 | 0.53382  | -3.75849 | C       | -1.14463 | 1.13506  | -2.74276 |
| H       | -2.37337 | 2.45869  | -3.01772 | H       | -0.23239 | 0.65772  | -3.10497 |
| H       | -0.49155 | -0.95463 | -1.14593 | H       | -1.23058 | 2.13614  | -3.18815 |
| H       | -1.74683 | -2.42844 | -2.60301 | H       | -1.99480 | 0.52193  | -3.05407 |
| H       | -3.63939 | 0.95502  | -4.48316 |         |          |          |          |
| H       | -3.34556 | -1.51707 | -4.30576 | 42      |          |          |          |
| C       | -0.87655 | 3.30210  | -1.22380 | ts2.out |          |          |          |
| H       | -0.28297 | 3.91062  | -0.53550 | C       | 1.45516  | -2.20944 | 3.07205  |
| H       | -1.92827 | 3.46142  | -0.97276 | C       | 0.12834  | -0.98427 | 1.61127  |
| H       | -0.68666 | 3.66086  | -2.24270 | C       | 1.93319  | -2.30085 | 0.58091  |
|         |          |          |          | C       | 1.17939  | -0.96450 | 0.50538  |
| 42      |          |          |          | C       | 2.55115  | -2.44986 | 1.97266  |
| ts1.out |          |          |          | O       | 0.70726  | -0.99323 | 2.88680  |
| C       | 2.24141  | -2.38561 | 1.96053  | H       | -0.57060 | -1.83092 | 1.49039  |
| C       | 0.60068  | -1.34512 | 0.70691  | H       | 1.21366  | -3.12939 | 0.44297  |
| C       | 2.55626  | -2.13912 | -0.56517 | H       | 3.32599  | -1.66833 | 2.08416  |
| C       | 1.55359  | -0.99892 | -0.42412 | H       | 0.76084  | -3.06772 | 2.98578  |
| C       | 3.27695  | -2.30217 | 0.77870  | O       | 3.10429  | -3.74194 | 2.15246  |
| O       | 1.25746  | -1.33586 | 1.94825  | H       | 3.16573  | -3.78949 | 3.15123  |
| H       | 0.12429  | -2.32994 | 0.53683  | O       | 2.88849  | -2.32302 | -0.48590 |
| H       | 2.01795  | -3.07883 | -0.78033 | H       | 2.39952  | -1.79646 | -1.15015 |
| H       | 3.89647  | -1.39836 | 0.93220  | C       | 2.05825  | -2.26857 | 4.52080  |
| H       | 1.72501  | -3.35566 | 1.82632  | O       | 2.85687  | -3.25521 | 4.69036  |
| O       | 4.07379  | -3.47122 | 0.78389  | O       | 1.70905  | -1.42290 | 5.35869  |
| H       | 4.22219  | -3.59688 | 1.76873  | O       | -0.60698 | 0.23561  | 1.43313  |
| O       | 3.45823  | -1.85277 | -1.64614 | C       | -1.23219 | 0.25969  | 0.19487  |
| H       | 2.86666  | -1.39801 | -2.26991 | O       | -2.15183 | -0.50002 | -0.08055 |
| C       | 2.96643  | -2.45494 | 3.35159  | C       | -1.09287 | 1.67269  | -0.46121 |
| O       | 3.95123  | -3.27457 | 3.36126  | C       | 0.33937  | 2.20745  | -0.31226 |
| O       | 2.53605  | -1.77560 | 4.29529  | H       | 1.02276  | 1.50470  | -0.79612 |
| O       | -0.38821 | -0.33594 | 0.62823  | H       | 0.59985  | 2.24403  | 0.74663  |
| C       | -0.89272 | -0.29868 | -0.73194 | H       | 0.43328  | 3.21964  | -0.73087 |
| O       | -1.72208 | -1.13268 | -1.09383 | H       | 1.91064  | -0.18461 | 0.84340  |
| C       | -1.05477 | 1.19213  | -1.20826 | O       | 0.62321  | -0.69437 | -0.71066 |
| C       | 0.14568  | 2.07488  | -0.80870 | C       | -1.55241 | 1.62770  | -1.92530 |
| H       | 1.04417  | 1.66021  | -1.27058 | C       | -2.47525 | 1.65884  | -4.61216 |
| H       | 0.29116  | 2.07959  | 0.27328  | C       | -2.86205 | 1.23089  | -2.25734 |
| H       | -0.00291 | 3.10961  | -1.14982 | C       | -0.71815 | 2.01816  | -2.98277 |
| H       | 2.12944  | -0.11674 | -0.06065 | C       | -1.16955 | 2.03774  | -4.30575 |

|         |          |          |          |         |          |          |          |
|---------|----------|----------|----------|---------|----------|----------|----------|
| C       | -3.31621 | 1.24676  | -3.57521 | H       | 0.20870  | -3.00420 | -1.39292 |
| H       | -3.50772 | 0.86495  | -1.46935 | H       | -0.33427 | -5.24515 | -2.34402 |
| H       | 0.30735  | 2.29999  | -2.77689 | H       | -4.49873 | -4.17655 | -2.46859 |
| H       | -0.48930 | 2.34521  | -5.09827 | H       | -2.69238 | -5.84840 | -2.88496 |
| H       | -4.33352 | 0.92632  | -3.79433 |         |          |          |          |
| H       | -2.82961 | 1.67240  | -5.64146 | 42      |          |          |          |
| C       | -2.05177 | 2.60393  | 0.33689  | ts4.out |          |          |          |
| H       | -1.74522 | 2.62806  | 1.38702  | C       | 2.34083  | -2.71280 | 1.83083  |
| H       | -3.08745 | 2.25337  | 0.29494  | C       | 0.75850  | -1.46394 | 0.71230  |
| H       | -2.01854 | 3.62638  | -0.06195 | C       | 2.58750  | -2.33546 | -0.68972 |
|         |          |          |          | C       | 1.69794  | -1.12524 | -0.43557 |
| 42      |          |          |          | C       | 3.33576  | -2.64657 | 0.61356  |
| ts3.out |          |          |          | O       | 1.45974  | -1.57893 | 1.92278  |
| C       | 3.18665  | 1.47197  | 1.46732  | H       | 0.20428  | -2.39942 | 0.50834  |
| C       | 1.34037  | 0.54060  | 0.41657  | H       | 1.96026  | -3.20846 | -0.94079 |
| C       | 3.08250  | -1.04705 | 1.13682  | H       | 4.03970  | -1.81254 | 0.79489  |
| C       | 2.07071  | -0.73229 | 0.03552  | H       | 1.73099  | -3.62065 | 1.65773  |
| C       | 4.02119  | 0.15133  | 1.31154  | O       | 4.02243  | -3.87929 | 0.51356  |
| O       | 2.20996  | 1.64977  | 0.42966  | H       | 4.19602  | -4.07916 | 1.48250  |
| H       | 0.88384  | 0.43400  | 1.42297  | O       | 3.48190  | -2.06642 | -1.78232 |
| H       | 2.54382  | -1.19114 | 2.09156  | H       | 2.91455  | -1.54366 | -2.37291 |
| H       | 4.62751  | 0.23787  | 0.39030  | C       | 3.10274  | -2.94413 | 3.18444  |
| H       | 2.66195  | 1.37367  | 2.43857  | O       | 4.01624  | -3.83888 | 3.09743  |
| O       | 4.84303  | -0.01806 | 2.45100  | O       | 2.75785  | -2.30905 | 4.19145  |
| H       | 5.14181  | 0.92685  | 2.61268  | O       | -0.15270 | -0.38102 | 0.70777  |
| O       | 3.77566  | -2.25663 | 0.79934  | C       | -0.69467 | -0.31831 | -0.62345 |
| H       | 3.07662  | -2.75033 | 0.33544  | O       | -1.52136 | -1.16571 | -0.98675 |
| C       | 4.10814  | 2.73739  | 1.59554  | C       | -0.99729 | 1.18656  | -1.00567 |
| O       | 5.10614  | 2.55294  | 2.37781  | H       | 2.35484  | -0.31629 | -0.04788 |
| O       | 3.79598  | 3.77783  | 0.99809  | O       | 0.92239  | -0.69373 | -1.50208 |
| O       | 0.31023  | 0.72350  | -0.53604 | C       | -1.13595 | 1.23015  | -2.54454 |
| C       | -0.09881 | -0.44318 | -1.26361 | H       | -0.18055 | 1.00341  | -3.02141 |
| H       | 2.65401  | -0.48254 | -0.87783 | H       | -1.48561 | 2.21567  | -2.88271 |
| O       | 1.13300  | -1.71312 | -0.19298 | H       | -1.85144 | 0.46109  | -2.84896 |
| C       | -1.49001 | -0.95937 | -0.76424 | C       | 0.04535  | 2.22012  | -0.56290 |
| O       | 0.17606  | -0.51803 | -2.45316 | C       | 1.96784  | 4.21052  | 0.08553  |
| C       | -1.56644 | -1.10081 | 0.76959  | C       | -0.27932 | 3.32117  | 0.24610  |
| H       | -1.40820 | -0.12562 | 1.24109  | C       | 1.37137  | 2.14053  | -1.03249 |
| H       | -0.77805 | -1.77383 | 1.10962  | C       | 2.31321  | 3.11598  | -0.71300 |
| H       | -2.55288 | -1.47839 | 1.07335  | C       | 0.66426  | 4.30228  | 0.56798  |
| C       | -2.48744 | 0.13734  | -1.21843 | H       | -1.28390 | 3.42495  | 0.64189  |
| H       | -2.14249 | 1.10222  | -0.83771 | H       | 1.63536  | 1.26059  | -1.61374 |
| H       | -3.49992 | -0.03596 | -0.83142 | H       | 3.33214  | 3.01314  | -1.08172 |
| H       | -2.52968 | 0.19280  | -2.31057 | H       | 0.37278  | 5.13831  | 1.20255  |
| C       | -1.82262 | -2.31813 | -1.40572 | H       | 2.70694  | 4.96914  | 0.33769  |
| C       | -2.45393 | -4.86889 | -2.47269 | C       | -2.38759 | 1.47138  | -0.39349 |
| C       | -3.14373 | -2.67797 | -1.71360 | H       | -2.35199 | 1.44737  | 0.70088  |
| C       | -0.81558 | -3.27358 | -1.64290 | H       | -3.06632 | 0.68174  | -0.72202 |
| C       | -1.13284 | -4.52612 | -2.16816 | H       | -2.78603 | 2.44497  | -0.71119 |
| C       | -3.46135 | -3.93461 | -2.23993 |         |          |          |          |
| H       | -3.94973 | -1.96962 | -1.54477 | 42      |          |          |          |

ts5.out

|   |          |          |          |
|---|----------|----------|----------|
| C | 3.15803  | 0.00033  | 1.53088  |
| C | 0.98031  | 0.36161  | 0.81820  |
| C | 2.67606  | 0.17388  | -0.96120 |
| C | 1.41052  | 0.91425  | -0.53009 |
| C | 3.74900  | 0.35189  | 0.11839  |
| O | 1.92508  | 0.67978  | 1.81635  |
| H | 0.86262  | -0.73963 | 0.77553  |
| H | 2.46052  | -0.90803 | -1.04032 |
| H | 4.03936  | 1.41927  | 0.12616  |
| H | 2.96584  | -1.09071 | 1.50413  |
| O | 4.86484  | -0.47970 | -0.13935 |
| H | 5.30228  | -0.49584 | 0.76436  |
| O | 3.07758  | 0.66963  | -2.24583 |
| H | 2.21188  | 0.89419  | -2.63301 |
| C | 4.20757  | 0.23192  | 2.67626  |
| O | 5.37566  | -0.20488 | 2.38059  |
| O | 3.84127  | 0.75374  | 3.73947  |
| O | -0.29637 | 0.90912  | 1.11232  |
| C | -0.92911 | 1.61898  | 0.06393  |
| H | 1.71082  | 1.96650  | -0.33520 |
| O | 0.35758  | 0.84113  | -1.41368 |
| C | -2.28784 | 0.95751  | -0.37785 |
| O | -0.82924 | 2.83672  | -0.00648 |
| C | -2.52302 | 1.34050  | -1.85678 |
| H | -1.74212 | 0.90923  | -2.48386 |
| H | -2.46312 | 2.42883  | -1.95240 |
| H | -3.51023 | 0.99858  | -2.19765 |
| C | -2.36250 | -0.56873 | -0.22802 |
| C | -2.56325 | -3.39898 | -0.11167 |
| C | -1.44034 | -1.39435 | -0.90247 |
| C | -3.37783 | -1.20357 | 0.50565  |
| C | -3.47988 | -2.59749 | 0.56555  |
| C | -1.54040 | -2.78352 | -0.83955 |
| H | -0.61822 | -0.89623 | -1.42065 |
| H | -4.10798 | -0.61282 | 1.04868  |
| H | -4.27994 | -3.05198 | 1.14871  |
| H | -0.80287 | -3.39261 | -1.35934 |
| H | -2.63671 | -4.48443 | -0.06527 |
| C | -3.36223 | 1.67196  | 0.47746  |
| H | -3.24952 | 1.43703  | 1.54177  |
| H | -4.37943 | 1.39977  | 0.16581  |
| H | -3.23185 | 2.74924  | 0.35662  |
